# Supplementary material for: Ikaros mediates gene silencing in T cells through Polycomb repressive complex 2
Source: PubMed Central journal article supplement (PMC4667618; doi:10.1038/ncomms9823), 2015-11-09
Supplement: ncomms9823-s1.pdf [file ncomms9823-s1.pdf]

**Supplementary Figure 1 - Analysis of H3K27me3 and H3K4me3 profiles in WT and  $I\kappa\kappa^{L/L}$  DP cells.**

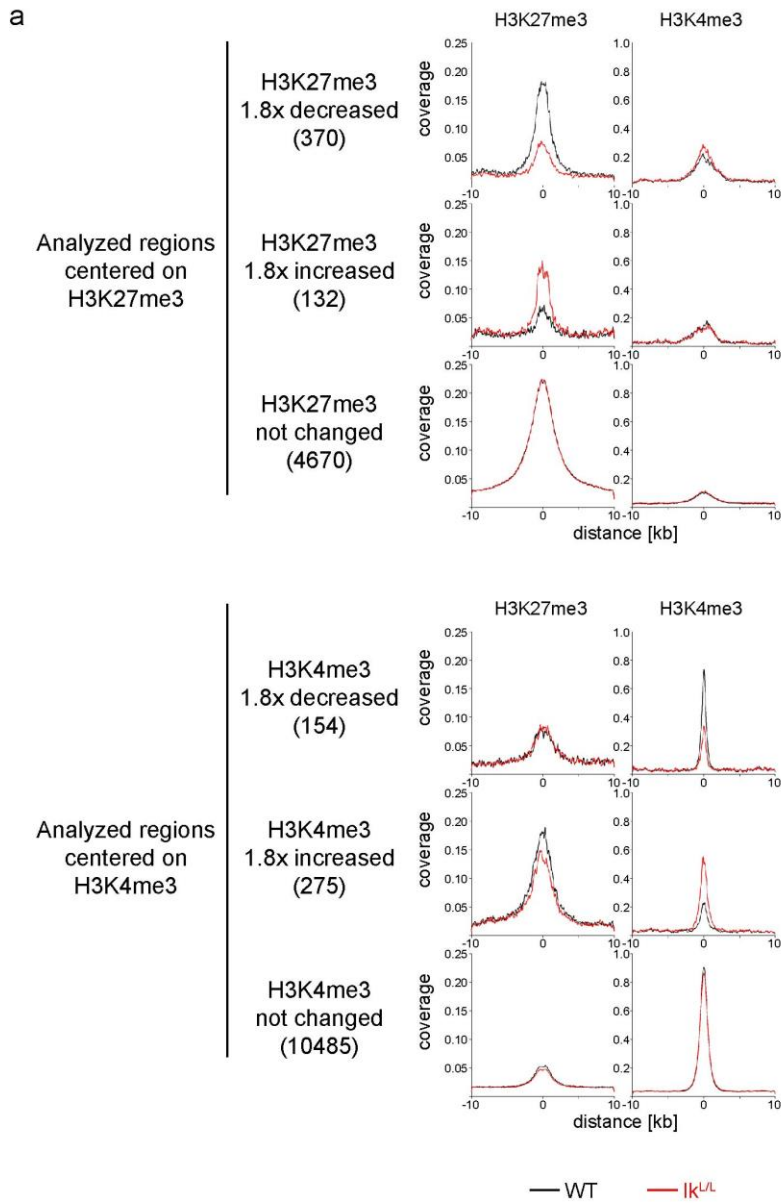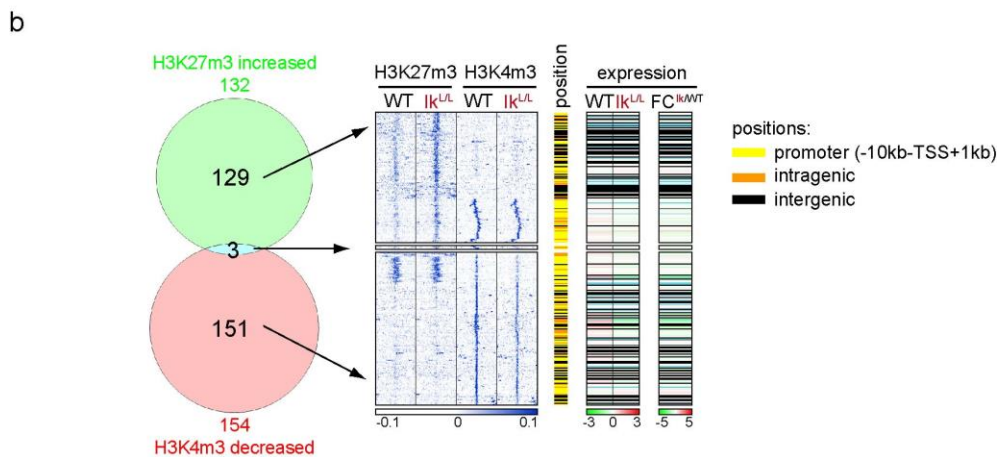

**(a)** Coverage plots for H3K27me3 and H3K4me3 centered on peaks that were increased/decreased ( $\geq 1.8x$ ) or unchanged ( $< 1.8x$ ) in  $Ik^{L/L}$  cells, as indicated. Values in parentheses indicate the numbers of islands in each group. Y-axes show the average normalized tag numbers in 20 bp bins 10 kb around the peak centers. **(b)** Venn diagram show the overlap between genomic regions with increased H3K27me3 or decreased H3K4me3 in  $Ik^{L/L}$  DP thymocytes. The blue-colored heatmap shows k-means clustering of the tag densities of the corresponding genomic regions for each group. z

**Supplementary Figure 2 - Global changes of H3K27me3 in WT and  $I\kappa L^L$  thymocytes during differentiation.**

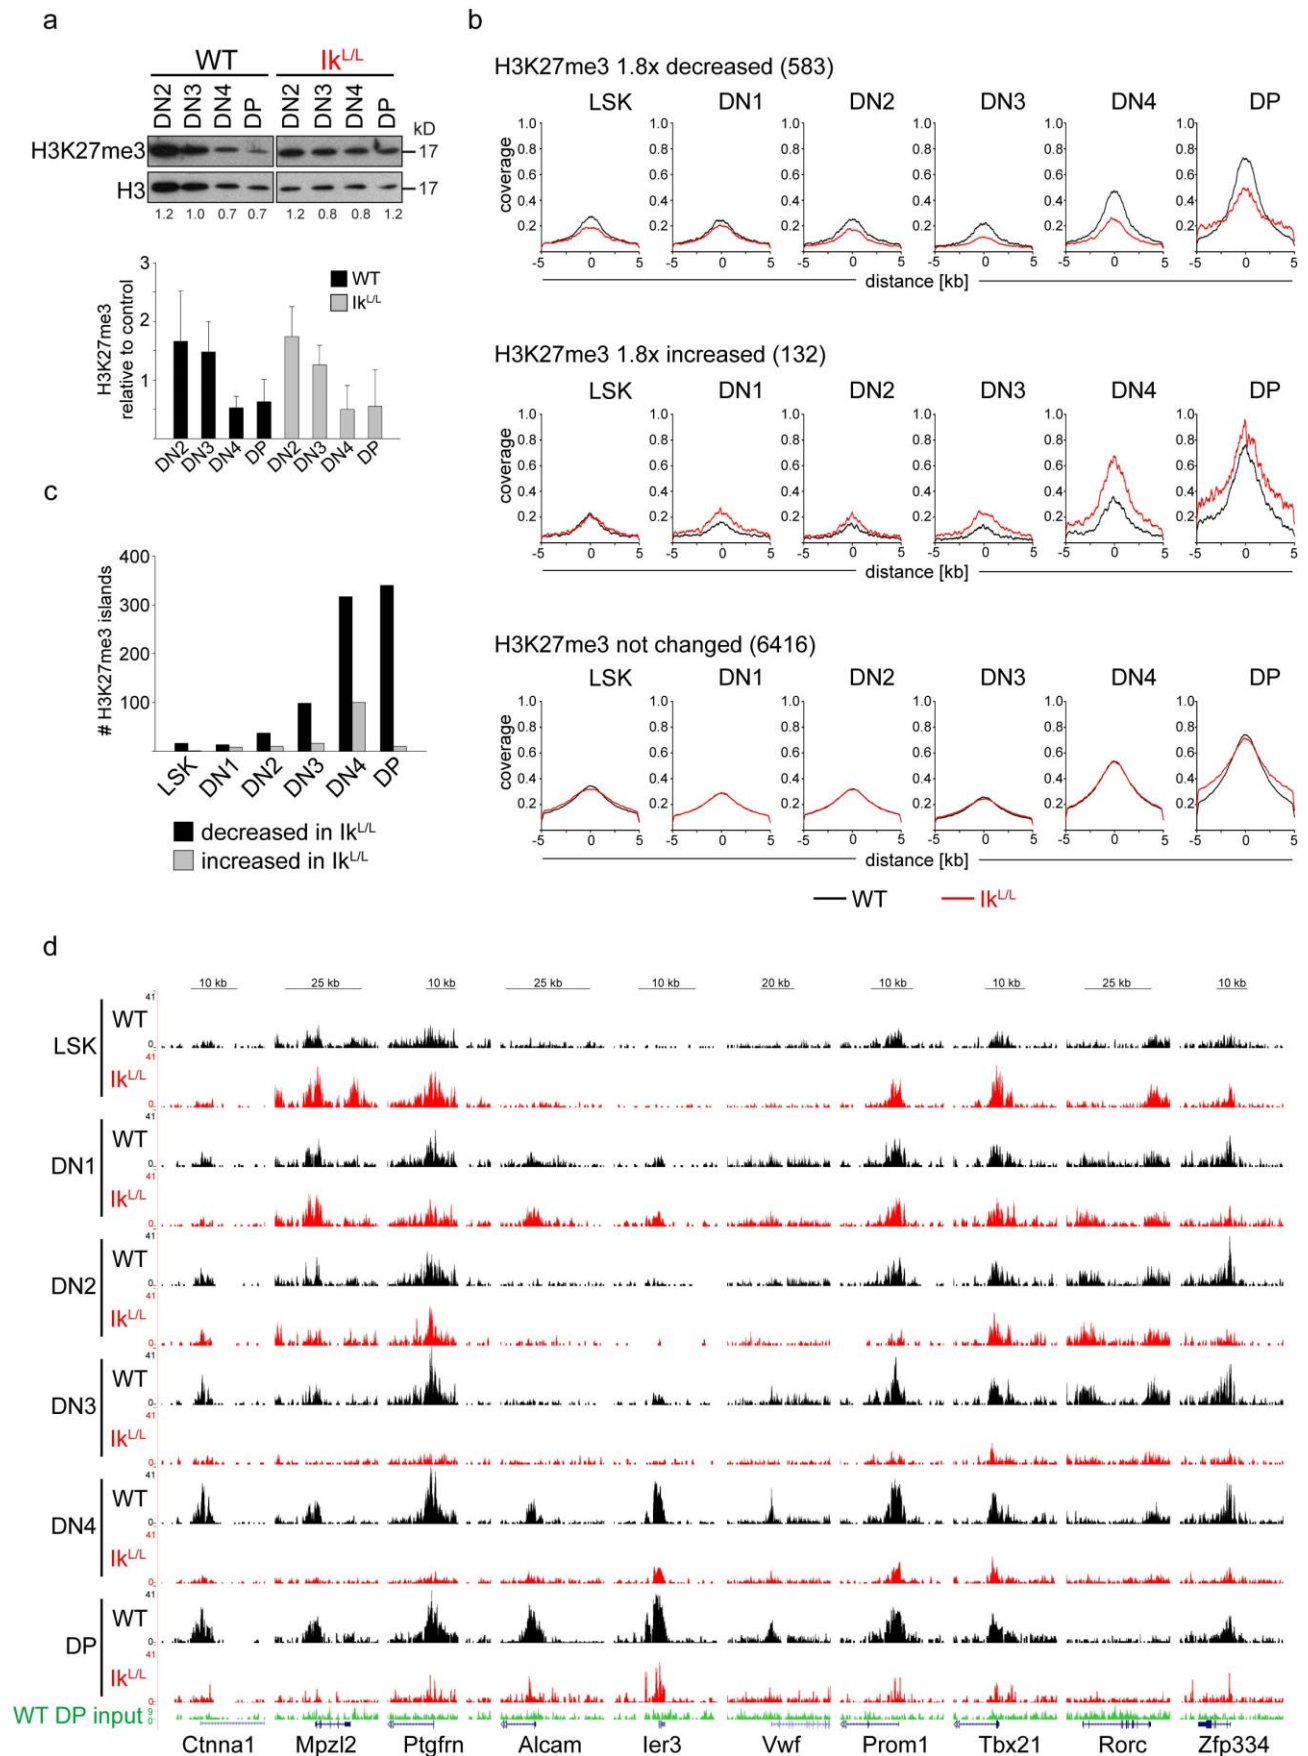

**(a)** Top: Western blot of H3K27me3 in total cell lysates of DN2 to DP thymocytes from WT and  $I\kappa^{L/L}$  mice. Histone H3 is shown as loading control. Numbers indicate the H3K27me3 signals relative to H3, as quantified by ImageJ (v1.44). Bottom: Relative H3K27me3 levels in DN2 to DP thymocytes from WT and  $I\kappa^{L/L}$  mice based on the quantification of n=5 Western blots. Error bars, SD **(b)** Coverage plots of H3K27me3 centered on peaks that are increased/decreased  $\geq 1.8x$  or unchanged ( $< 1.8x$ ) in the indicated populations. LSK data represent the average of 2 experiments. Values in parentheses indicate the numbers of islands in each group. Y-axes show average normalized tag numbers in 20 bp bins 10 kb around the peak centers. **(c)** Number of H3K27me3 islands that were changed  $> 1.8x$  in  $I\kappa^{L/L}$  LSK and DN1 to DP cells compared with WT. LSK corresponds to the mean of 2 independent experiments. DP data correspond to islands that were changed in both the sorted DP ChIP-seq experiments (Fig. 2, a and b) and the DP/CD8 experiment (Fig. 1, a-c). **(d)** Representative genome browser tracks of H3K27me3 ChIP-seq data from the indicated cell populations. WT DP input controls in green.

### Supplementary Figure 3 - Expression of genes with decreased H3K27me3.

a

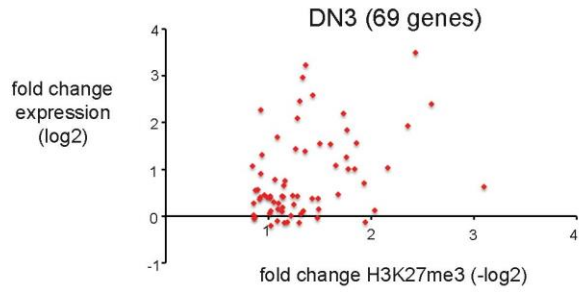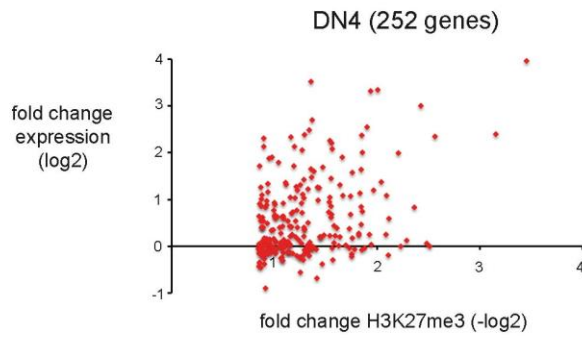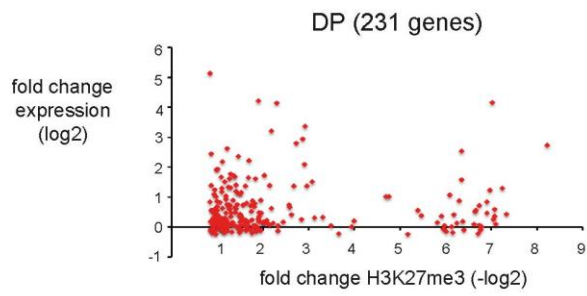

b

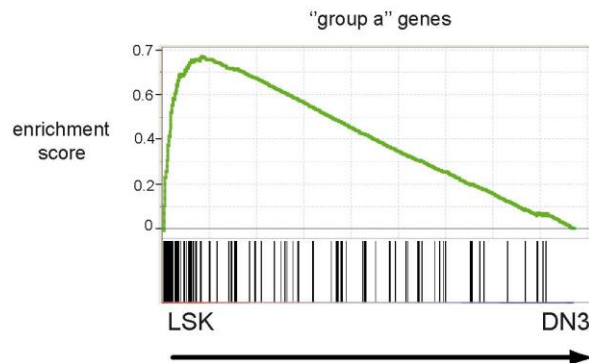

**(a)** Scatter plots comparing the changes in H3K27me3 levels (x-axis) and the expression of the corresponding genes in the DN3, DN4 and DP subsets (y-axis). Genes that exhibited decreased H3K27me3 levels  $>1.8x$  in DN3, DN4 or DP cells were selected, and the corresponding probe sets on the Affymetrix 430 2.0 array identified. Where there were multiple probe sets for a given gene, only the one with the highest absolute fold change was retained. **(b)** Gene set enrichment analysis for the group *a* genes from Fig. 2c, showing their higher expression in LSK cells vs. DN3 cells. Probe sets from the Affymetrix 430 2.0 array were ranked according to the fold change between LSK and DN3 cells.

# Supplementary Figure 4 - Ikaros DNA binding profiles during T cell differentiation.

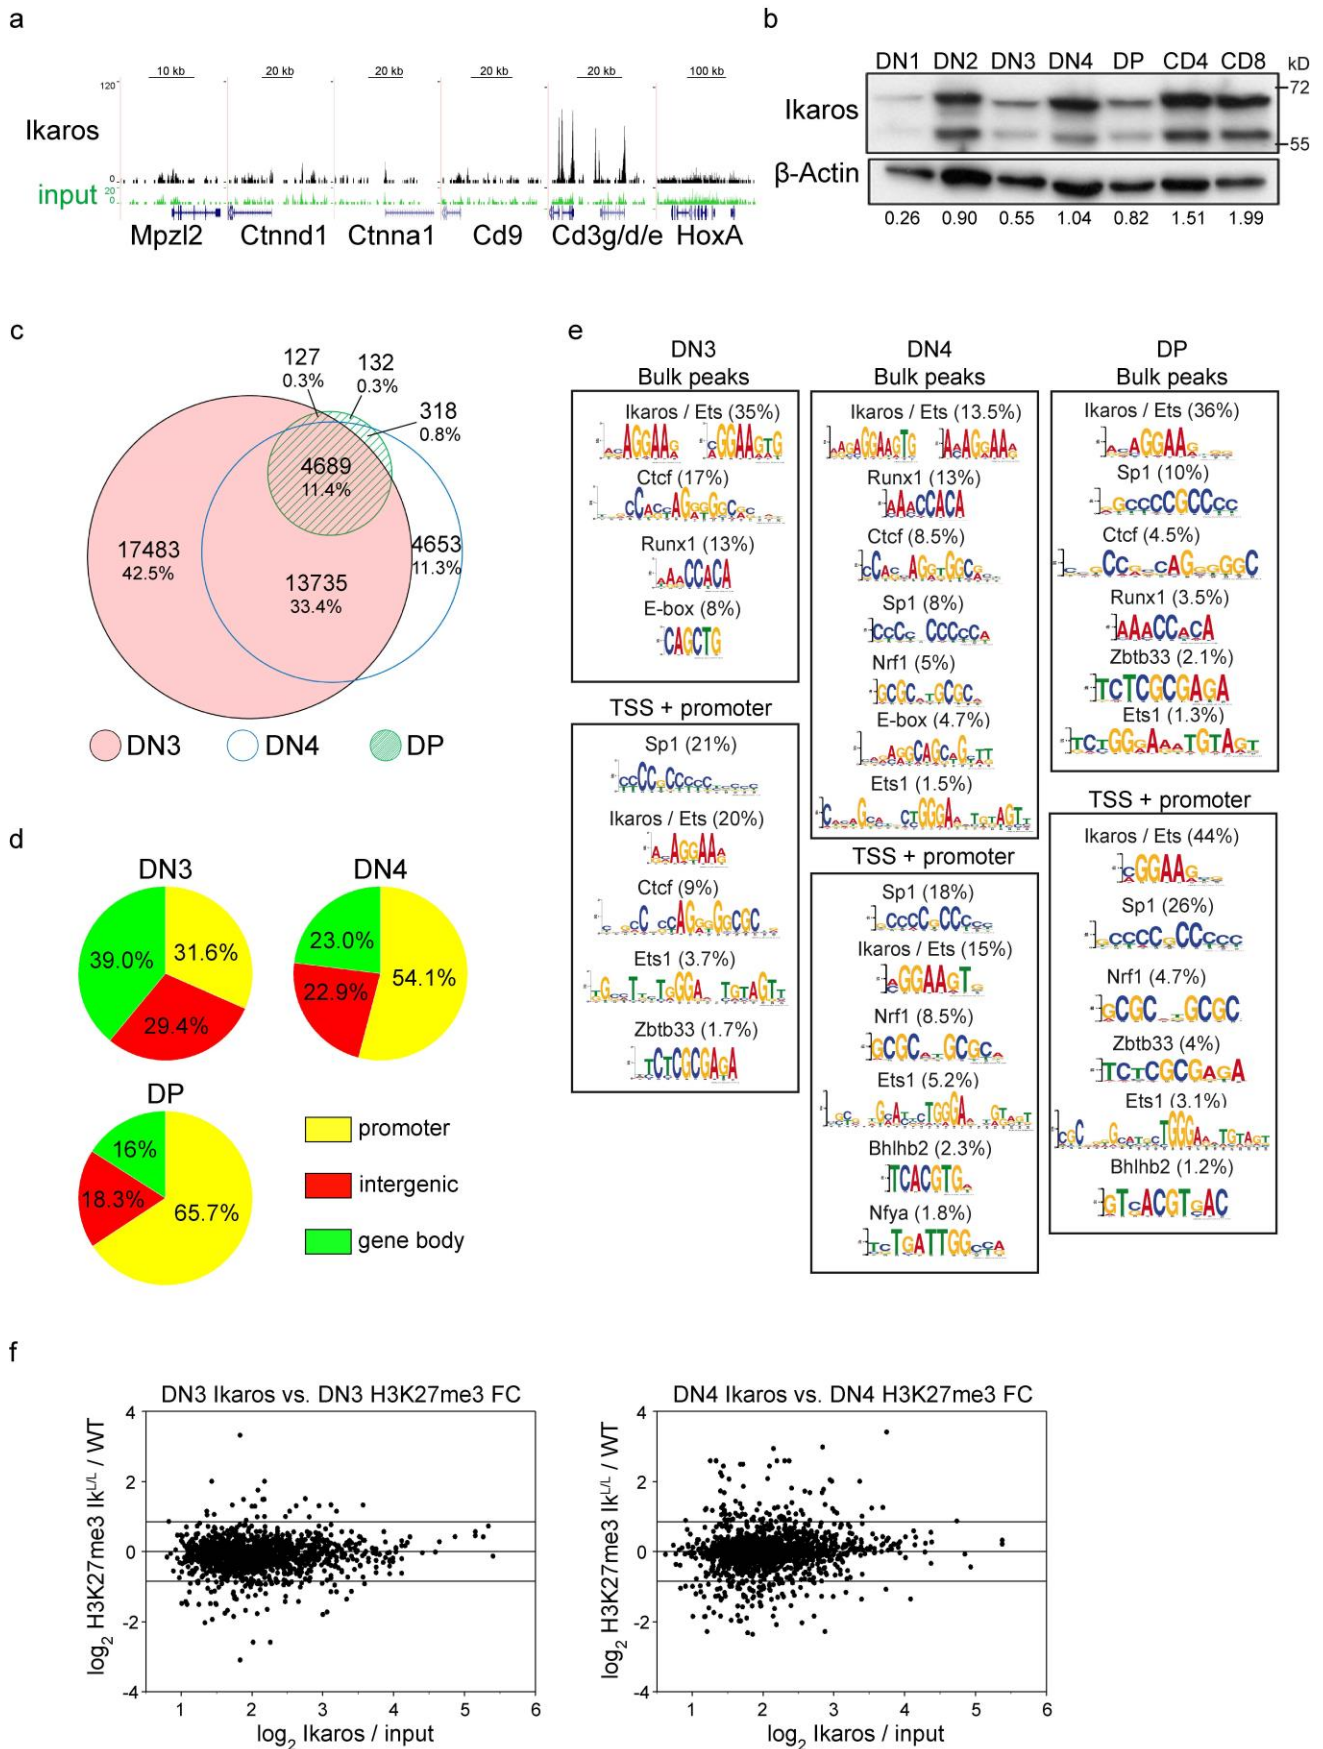

**(a)** Genome browser tracks of Ikaros ChIP-seq in WT DP cells. Input controls in green. *Cd3d* is shown as a positive control. **(b)** Ikaros protein expression in early thymocytes. Western blots of whole cell lysates of WT  $3.5 \times 10^4$  (DN1) or  $7 \times 10^4$  (DN2-4, DP, CD4, CD8) thymocytes. Numbers indicate the Ikaros signals relative to  $\beta$ -actin, as quantified by ImageJ (v1.44). Representative of  $\geq 3$  independent experiments. **(c)** Venn diagram of the 41,137 merged genomic regions bound by Ikaros in DN3, DN4 and DP cells (corresponding to either a single peak or multiple peaks per region, as each merged genomic region may comprise multiple overlapping binding sites from the different populations; thus these numbers may not match those in the corresponding text). **(d)** Pie charts depicting the distribution of Ikaros peaks from DN3 (37,050), DN4 (23,656) and DP (5,351) cells among promoter regions (from -10 kb to +1 kb of the TSS), gene bodies or intergenic regions. **(e)** Motif analysis of Ikaros peaks. **(f)** Scatter plots depicting Ikaros enrichment over input (x-axis,  $\log_2$ ) vs  $Ik^{L/L}/WT$  H3K27me3 FC (y-axis,  $\log_2$ ) in the DN3 and DN4 populations at regions with overlapping Ikaros binding and H3K27me3. The horizontal lines show the threshold used for the selection of differential H3K27me3 levels [ $\log_2(1.8)=0.84$ ].



**Supplementary Figure 5 - Characterization of  $I\kappa^{ff}$  Lck-Cre<sup>+</sup> mice.**

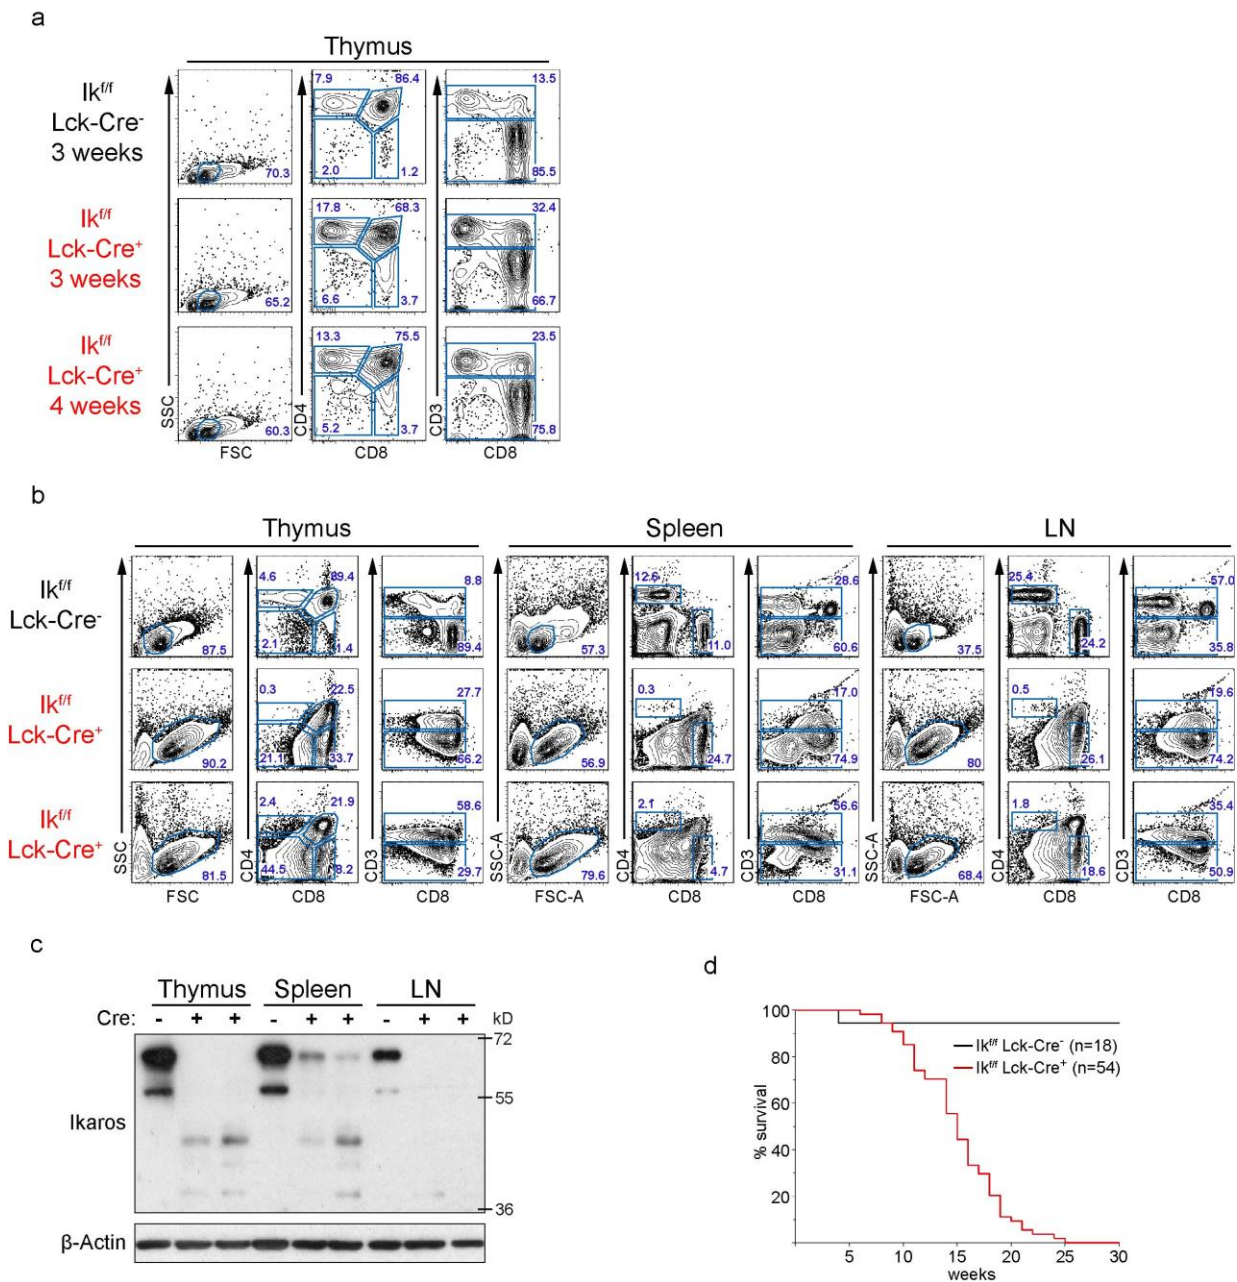

**(a)** Flow cytometry analysis of thymocytes from 3-week-old  $I\kappa^{ff}$  Lck-Cre<sup>-</sup> and  $I\kappa^{ff}$  Lck-Cre<sup>+</sup> mice. Numbers indicate percentage of the gated populations. Mutant mice display an increase in the proportion of mature CD4<sup>+</sup>CD3<sup>+</sup> and CD8<sup>+</sup>CD3<sup>+</sup> cells. **(b)** Analysis of the thymus, spleen and lymph nodes (LN) of moribund  $I\kappa^{ff}$  Lck-Cre<sup>+</sup> mice with T cell leukemia and a healthy  $I\kappa^{ff}$  Lck-Cre<sup>-</sup> mouse of similar age (~4 months). Numbers indicate percentage. **(c)** Western blots of total cell lysates from the indicated organs from the mice illustrated in (b), analyzed with an anti-Ikaros antibody specific for the non-targeted N-terminal part of Ikaros. **(d)** Survival curves of  $I\kappa^{ff}$  Lck-Cre<sup>-</sup> and  $I\kappa^{ff}$  Lck-Cre<sup>+</sup> mice.

**Supplementary Figure 6 - Decreased Suz12 binding in  $I\kappa L/L$  DN3 thymocytes at Ikaros target genes.**

a

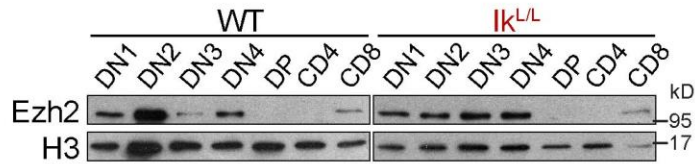

b

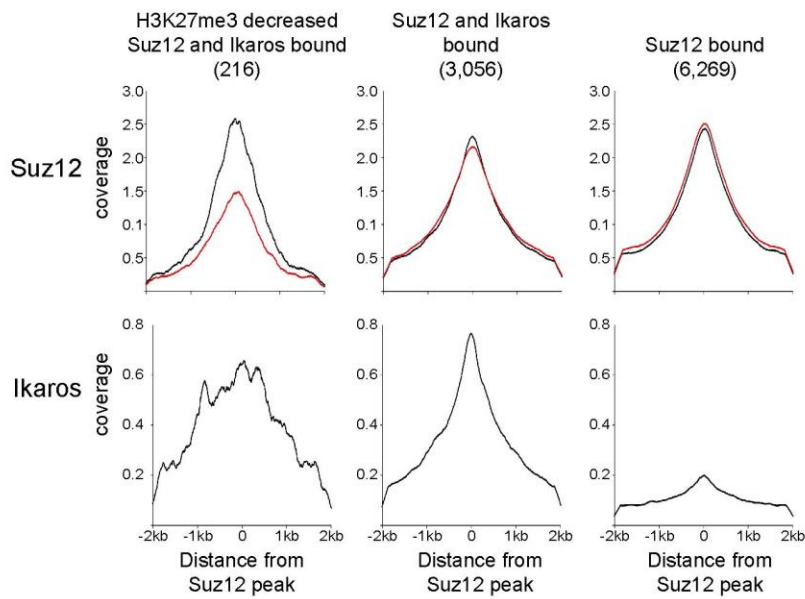

c

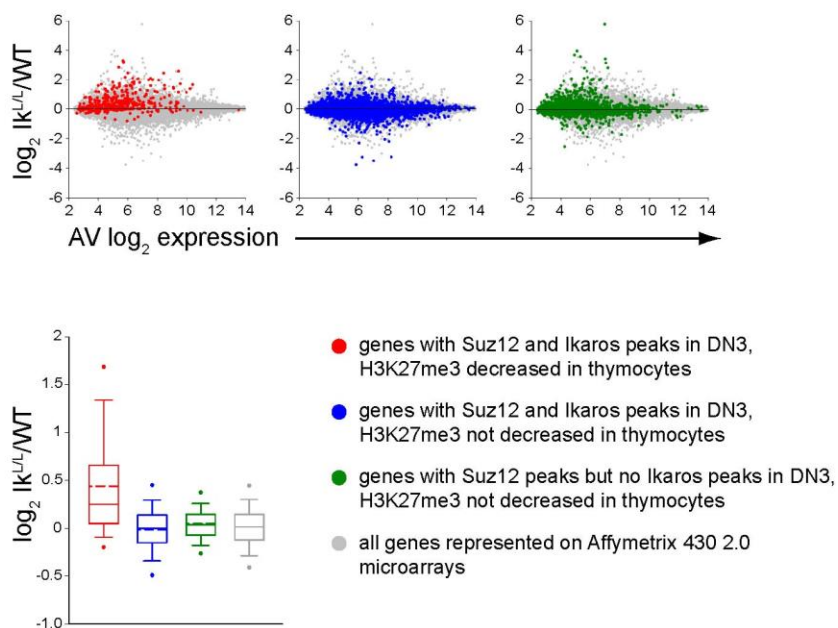

**(a)** Western blots of whole cell lysates for Ezh2 abundance in WT and I $k^{L/L}$  thymocyte subsets. Representative of 3 independent experiments. **(b)** Coverage plots of Suz12 peaks from WT (black) and I $k^{L/L}$  (red) DN3 cells, and Ikaros peaks from WT DN3 cells, centered on 9,541 Suz12 peaks ( $\pm 2$  kb) which were divided into: (left) 216 Suz12 peaks overlapping with Ikaros ( $p \leq 10^{-7}$ ) and H3K27me3 in WT cells at positions where H3K27me3 was decreased in I $k^{L/L}$  thymocytes; (middle) 3,056 Suz12 peaks overlapping with Ikaros where H3K27me3 was not decreased in I $k^{L/L}$  thymocytes; (right) the rest of the Suz12 peaks (6,269) that did not overlap with Ikaros. **(c)** Scatter plots and box plot analysis of Affymetrix gene expression data corresponding to the 3 groups of Suz12 peaks in (b). Red corresponds to the 216 Suz12 peaks in (b) which mapped to 187 genes that were represented by 430 probe sets. Blue corresponds to the 3,056 Suz12 peaks in (b) which mapped to 2,500 genes that were represented by 4,868 probe sets. Green corresponds to the 6,269 Suz12 peaks in (b) which mapped to 3,380 genes that were represented by 5,423 probe sets. Gray shows all of the probe sets present on the Affymetrix 430 2.0 microarrays. In the box plots, dashed lines indicate means, dots indicate the 5<sup>th</sup> and 95<sup>th</sup> percentiles.

**Supplementary Figure 7 - Ik1-ER expression in ILC87 cells.**

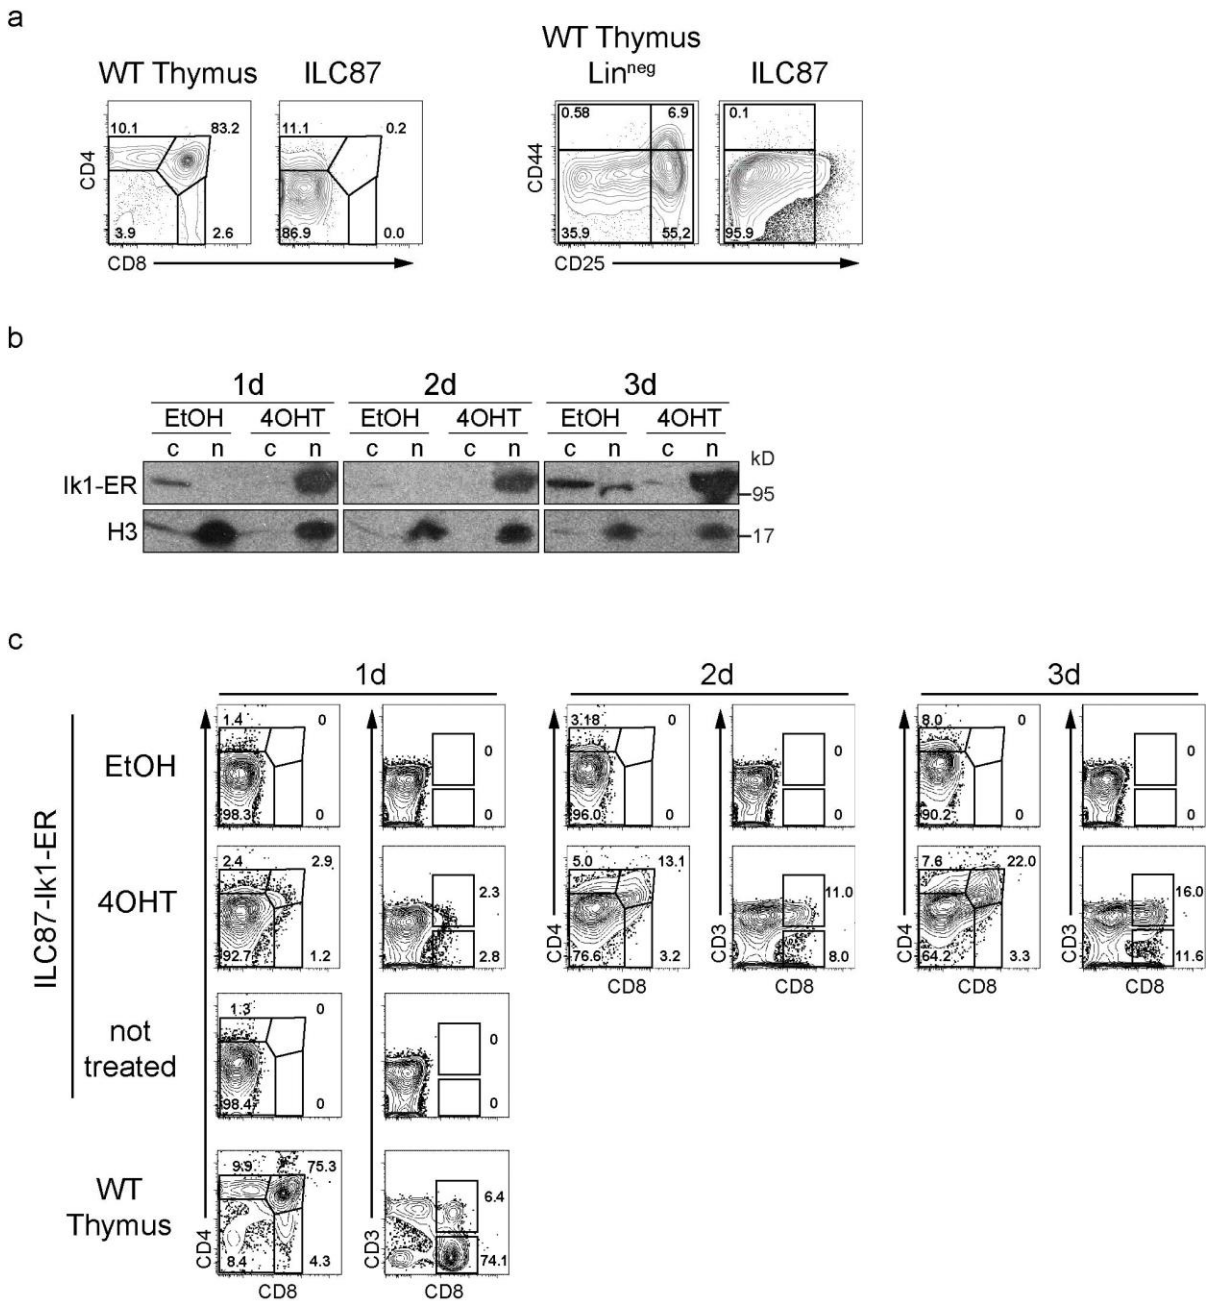

**(a)** Cell surface expression of CD4, CD8, CD25 and CD44 on ILC87 cells. Staining of WT thymocytes is shown as control. **(b)** Western blot of cytoplasmic (c) and nuclear (n) extracts of ILC87-Ik1-ER cells treated with EtOH or 4OHT for 1-3d as indicated. Histone H3 was used as a loading control. Results are representative of  $\geq 3$  independent experiments. **(c)** ILC87-Ik1-ER cells were treated with EtOH or 4OHT for 1-3d, or left untreated as indicated and then analyzed. WT thymocytes were used as reference. Numbers indicate the percentages. Representative of 2 experiments.

**Supplementary Figure 8 - Activation of Ikaros in ILC87-Ik1-ER cells induces H3K27 trimethylation.**

a

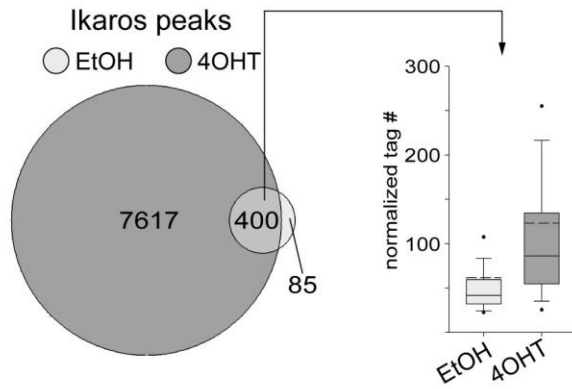

b

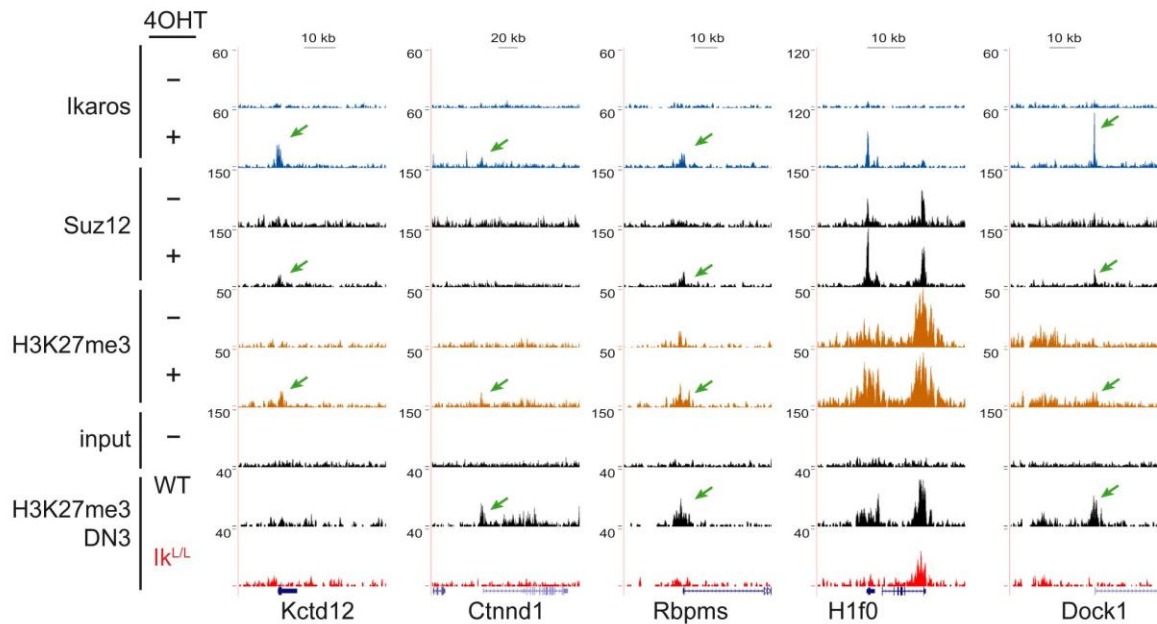

c

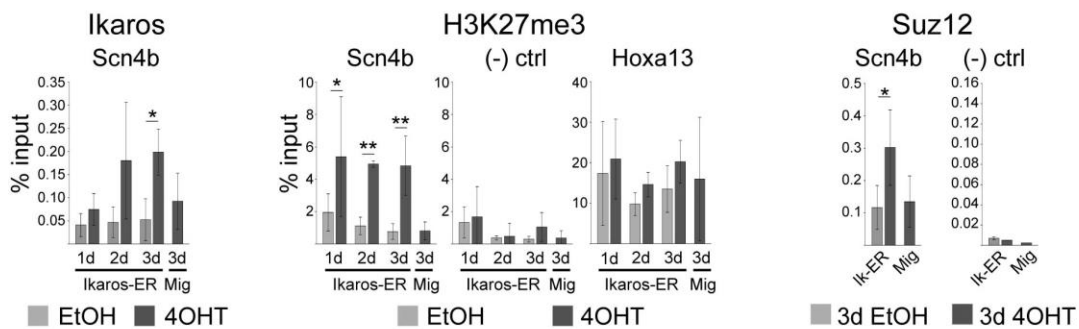

d

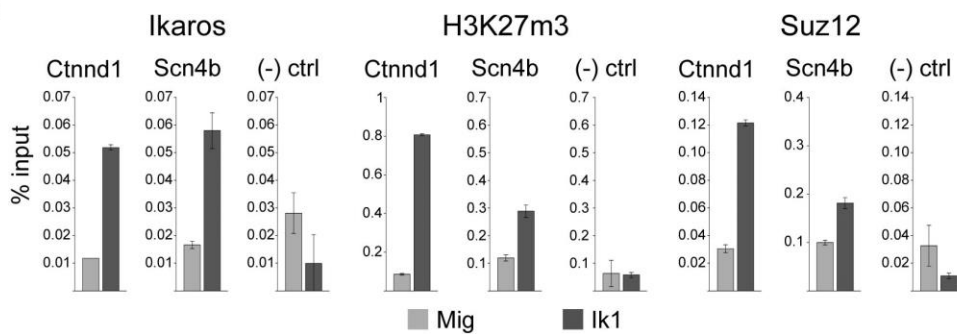

**(a)** Venn diagram of the Ikaros peaks identified in 4OHT- and EtOH-treated ILC87-Ik1-ER cells by ChIP-seq. The intersection contains the 400 peaks that overlap. Box plots of the normalized tag count distributions of the 400 overlapping Ikaros peaks (right) indicate small Ikaros binding in the EtOH control at these sites which is strongly increased in the 4OHT-treated cells. Dashed lines indicate means, dots indicate the 5<sup>th</sup> and 95<sup>th</sup> percentiles. **(b)** Representative genome browser tracks showing ChIP-seq of Ikaros, Suz12 and H3K27me3 in ILC87-Ik1-ER cells treated with 4OHT (+) or EtOH (-) for 1 (Ikaros) or 3 days (Suz12 and H3K27me3). **(c)** ChIP-qPCR analysis of Ikaros, H3K27me3 and Suz12 at the *Scn4b* locus in ILC87-Ik1-ER cells treated with 4OHT or EtOH for the indicated times. Control samples (Mig) are ILC87 cells transduced with the empty MigR1 vector and treated with 4OHT for 3d. Negative control (ctrl) regions were measured with primers annealing to sequences 7.8 kb upstream of the TSS of *Mpzi2* (middle panel) or to exon 6 of *Cd4* (right panel). % input = [(ab ChIP)-(IgG ChIP)]/1% input. Error bars, SD; (\*): p<0.05, (\*\*): p<0.01, two-sample t-test; n=3-7. **(d)** ChIP-qPCR analysis of Ikaros, H3K27me3 and Suz12 at the *Ctnnd1* and *Scn4b* loci in ILC87-Ik1-Bcl2 cells constitutively expressing non-tagged WT Ikaros and ILC87-Mig-Bcl2 control cells. Negative control (ctrl) regions were measured with primers annealing to exon 6 of *Cd4*. % input = [(ab ChIP)-(IgG ChIP)]/1% input. Results are representative of three experiments. Error bars represent the SD of technical duplicates.

**Supplementary Figure 9 - Mta2 and Mi2 $\beta$  depletion in ILC87-Ik1-Bcl2 cells.**

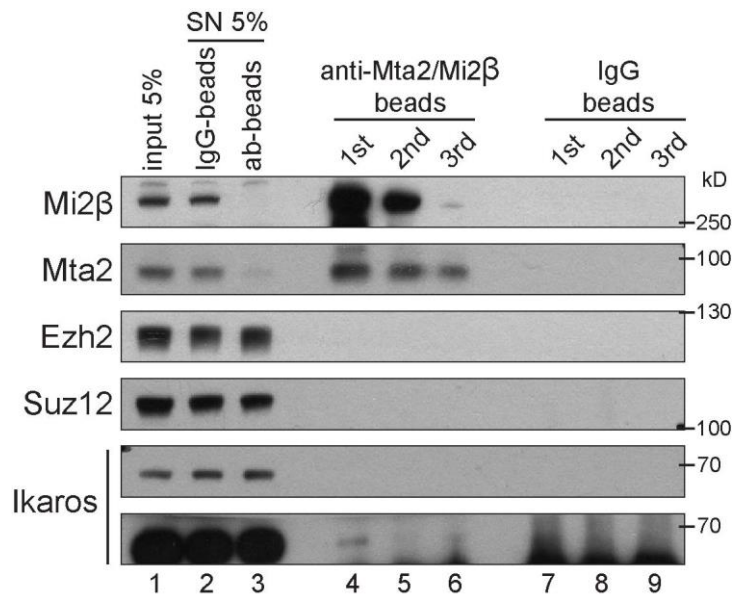

Western blots of Mta2 and Mi2 $\beta$  capture on the beads that were used in the 3 consecutive IP steps for the depletion of these proteins from the nuclear extracts of ILC87-Ik1-Bcl2 cells in Fig. 7g. 1/4 of the Protein A/G beads coupled to anti-Mta2 and anti-Mi2 $\beta$  antibodies (lanes 4-6) or to IgG (lanes 7-9) were analyzed from each IP step (1st-3rd). 5% of the depleted (lane 3) and non-depleted (lane 2) supernatants and 5% input (lane 1) are also shown. An overexposed image of the Ikaros Western blot is shown at the bottom.

# Supplementary Figure 10 - Original scans of Western blots in Figures 3, 6 and 7

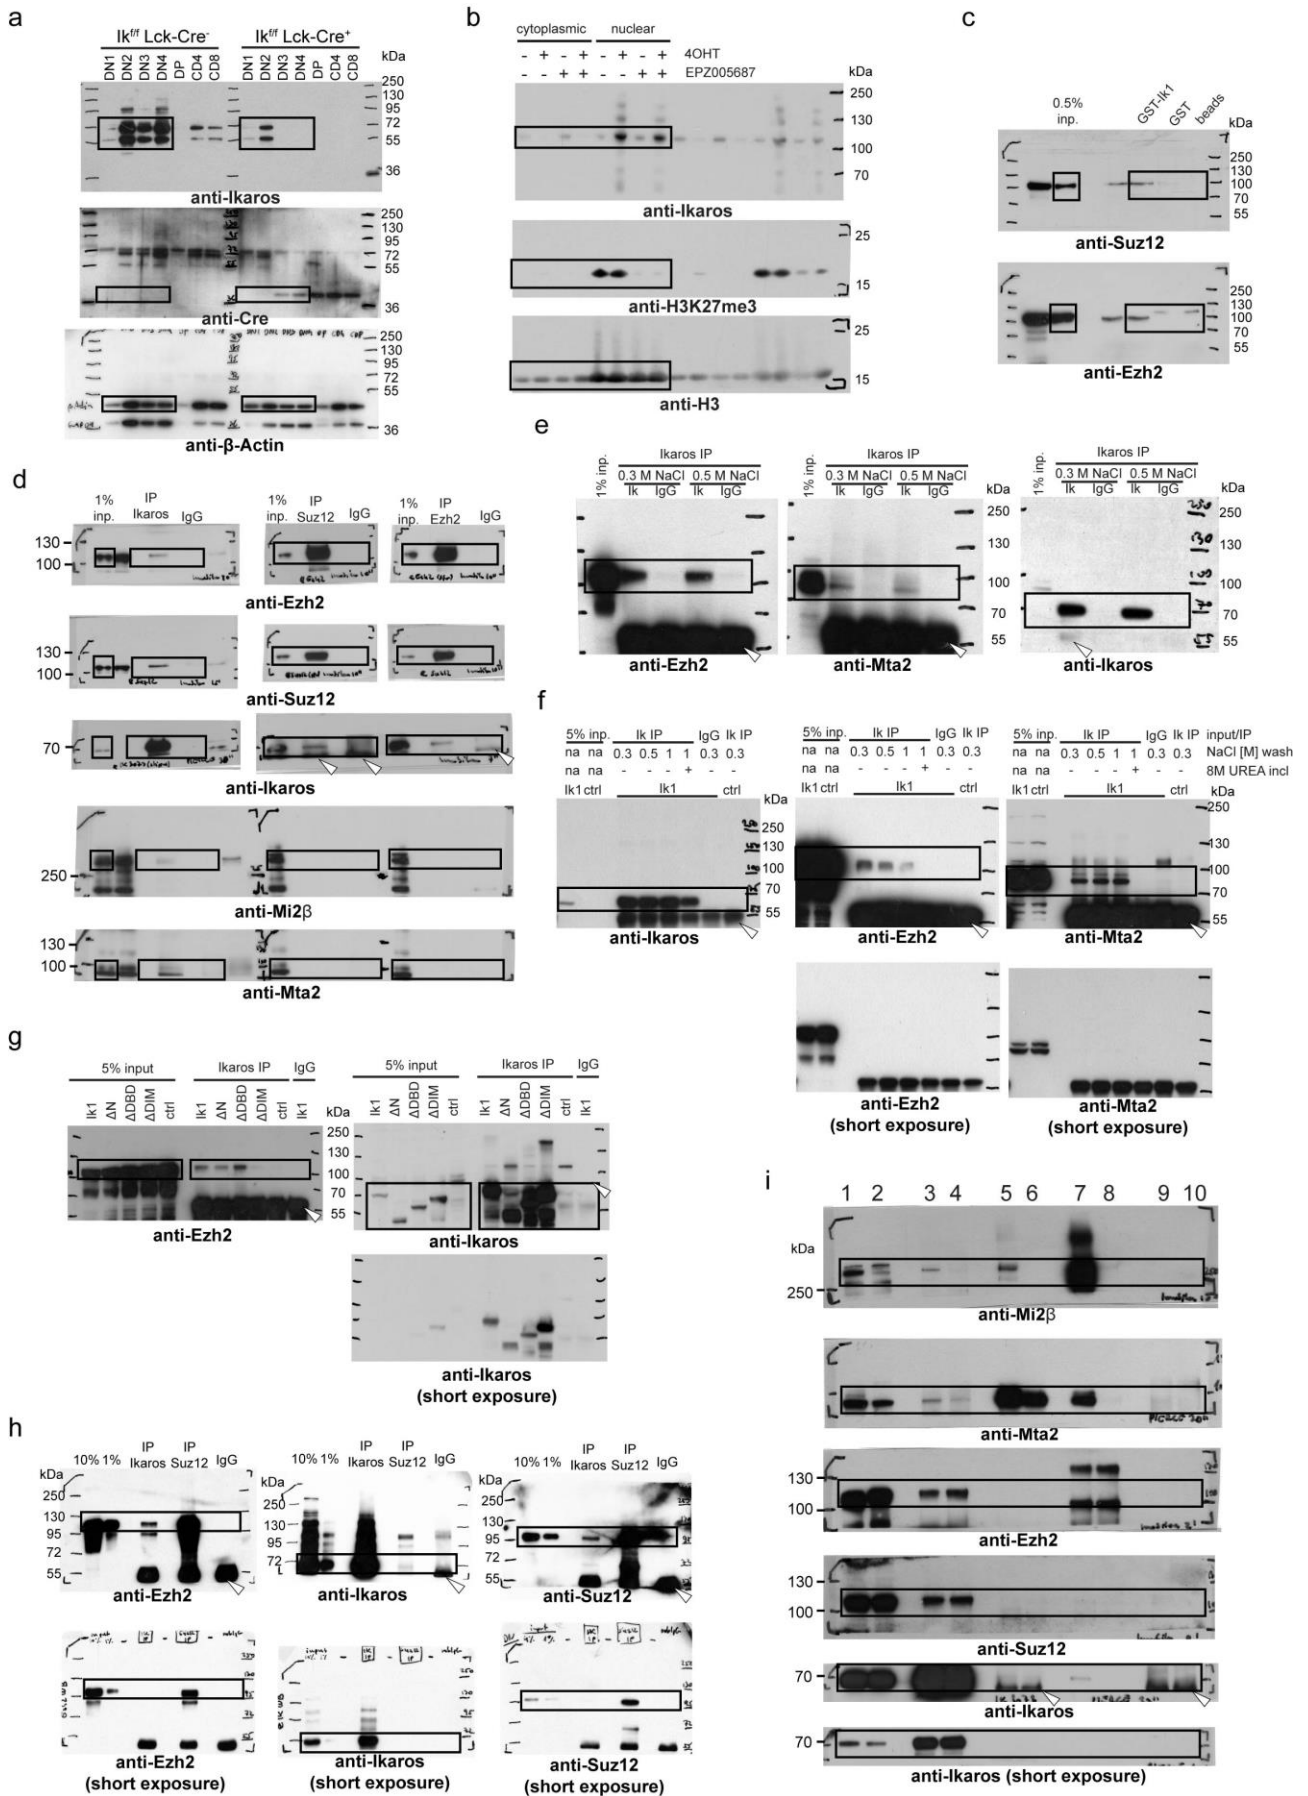



**(a)** corresponds to Fig. 3c. **(b)** corresponds to Fig. 6c. **(c-i)** panels c-i correspond to Fig. 7 a-g, respectively. Boxed areas correspond to the parts of the scans shown in the figures. White arrowheads point to IgG heavy chains.

**Supplementary Figure 11 - Original scans of Western blots in Supplementary Figures 2, 4-7 and 9**

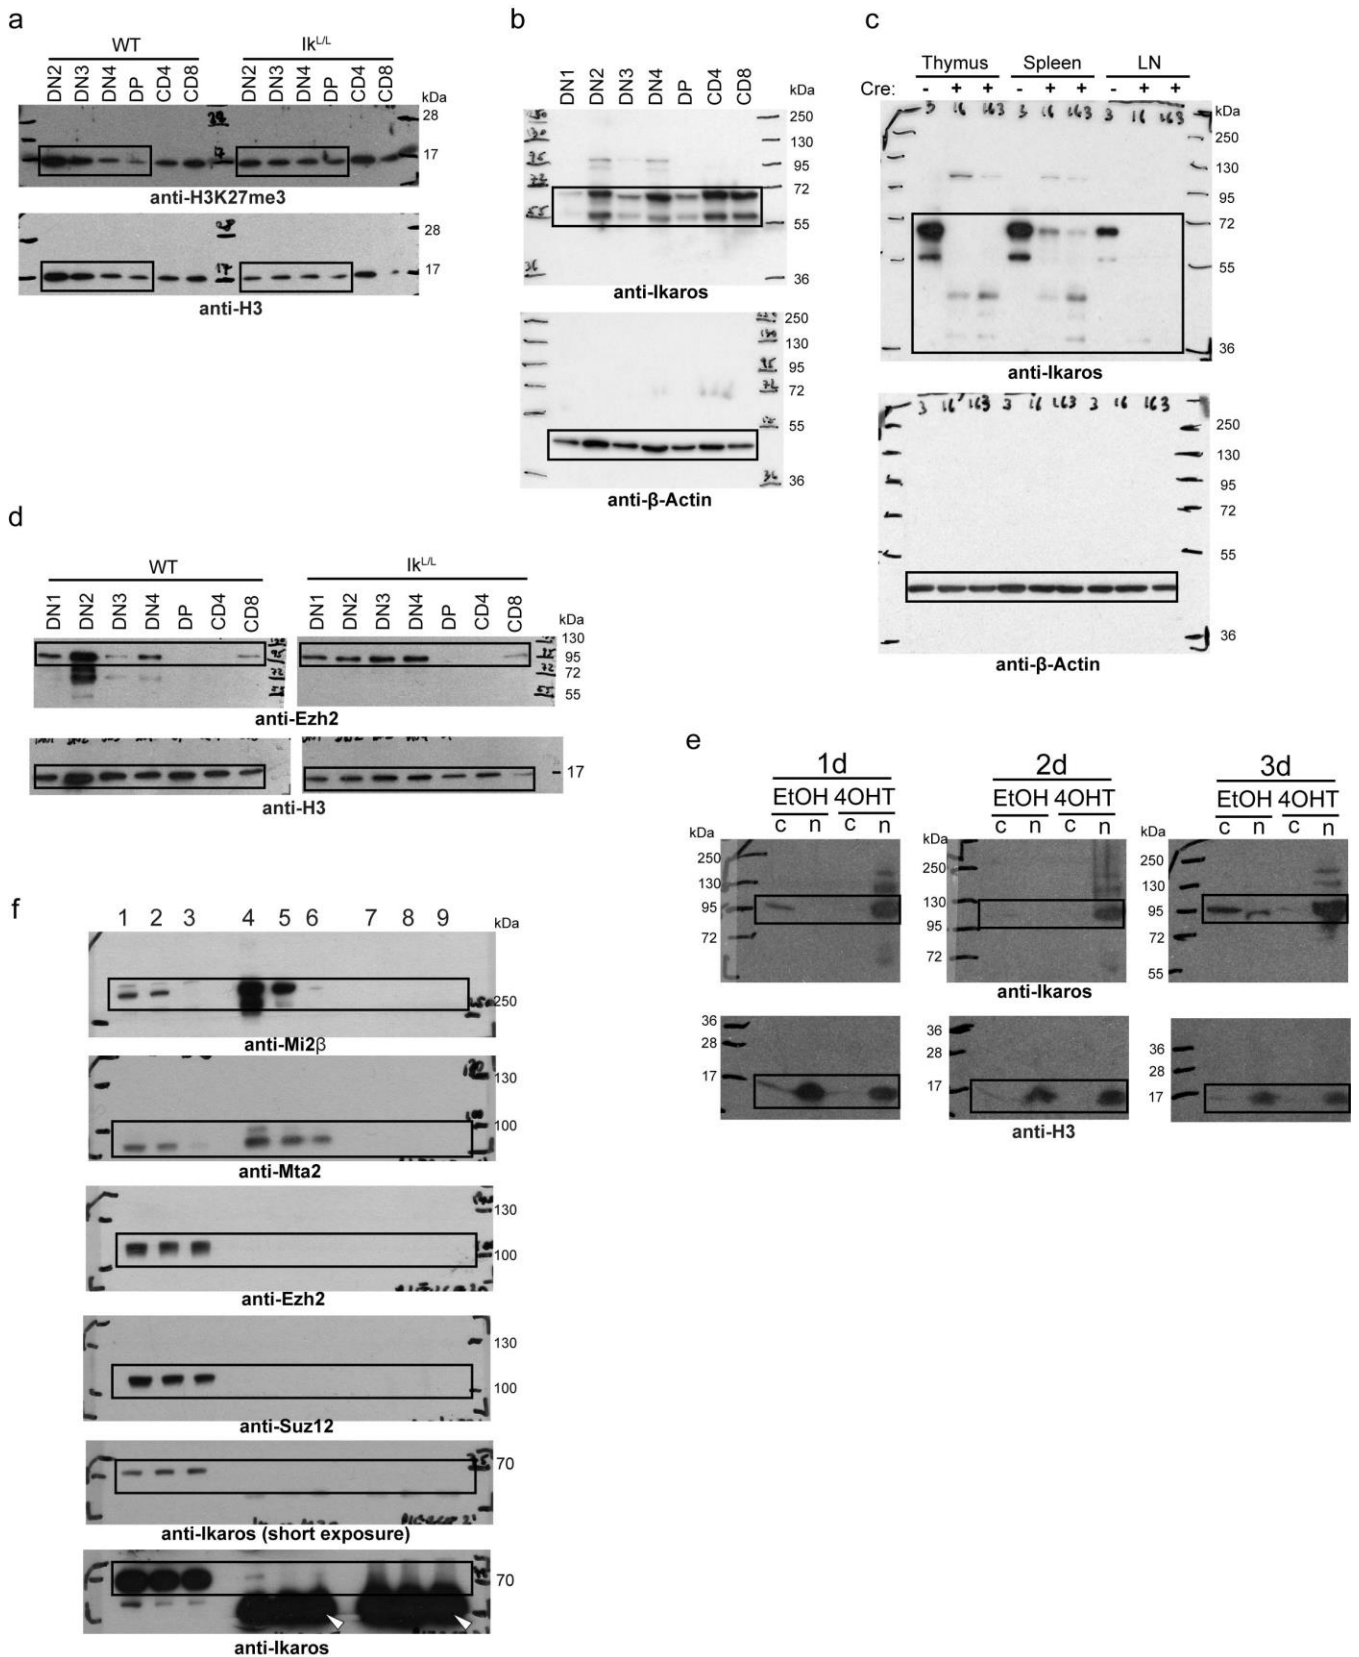

**(a)** corresponds to Supplementary Fig. 2a. **(b)** corresponds to Supplementary Fig. 4b. **(c)** corresponds to Supplementary Fig. 5c. **(d)** corresponds to Supplementary Fig. 6a. **(e)** corresponds to Supplementary Fig. 7b. **(f)** corresponds to Supplementary Fig. 9. Boxed areas correspond to the parts of the scans shown in the figures. White arrowheads point to IgG heavy chains.

**Supplementary Table 1 - 583 genomic regions with >1.8-fold decreased H3K27me3.**

| <b>Chromosome</b> | <b>Start</b> | <b>End</b> | <b>Gene</b>   |
|-------------------|--------------|------------|---------------|
| chr1              | 16095800     | 16097599   | Rdh10         |
| chr1              | 34291400     | 34296799   | Mir5103       |
| chr1              | 39119800     | 39121599   | Intergenic    |
| chr1              | 51969800     | 51975999   | Myo1b         |
| chr1              | 53007800     | 53010799   | 1700019D03Rik |
| chr1              | 55463200     | 55464599   | Plcl1         |
| chr1              | 59536600     | 59544199   | Fzd7          |
| chr1              | 59817800     | 59825399   | Bmpr2         |
| chr1              | 65230800     | 65235199   | ldh1          |
| chr1              | 69872600     | 69873999   | Spag16        |
| chr1              | 78564000     | 78565599   | Intergenic    |
| chr1              | 82278000     | 82295999   | Irs1          |
| chr1              | 87830200     | 87831999   | Intergenic    |
| chr1              | 94719400     | 94734399   | Gpc1          |
| chr1              | 94742400     | 94748599   | Mir149        |
| chr1              | 107739800    | 107742399  | Tnfrsf11a     |
| chr1              | 121358000    | 121359399  | Intergenic    |
| chr1              | 121538800    | 121540399  | Epb4.1I5      |
| chr1              | 121542000    | 121545599  | Epb4.1I5      |
| chr1              | 133856800    | 133864399  | Slc45a3       |
| chr1              | 133961000    | 133967799  | Mfsd4         |
| chr1              | 135074200    | 135080999  | Intergenic    |
| chr1              | 135694400    | 135697799  | Intergenic    |
| chr1              | 135750800    | 135752799  | Intergenic    |
| chr1              | 135802000    | 135807999  | Optc          |
| chr1              | 136192800    | 136197999  | Myog          |
| chr1              | 136275600    | 136280199  | 4933406M09Rik |
| chr1              | 137477000    | 137485599  | Nav1          |
| chr1              | 138692800    | 138695599  | Intergenic    |
| chr1              | 154469400    | 154473999  | Rgl1          |
| chr1              | 158239000    | 158243599  | Nphs2         |
| chr1              | 173364400    | 173373599  | F11r          |
| chr1              | 174135400    | 174137199  | Pea15a        |
| chr1              | 174171000    | 174176999  | Atp1a4        |
| chr1              | 180204600    | 180208999  | Intergenic    |
| chr1              | 181595800    | 181602999  | Sccpdh        |
| chr1              | 181777400    | 181778799  | Intergenic    |
| chr1              | 181883600    | 181892799  | Cdc42bpa      |
| chr1              | 182723000    | 182725999  | Intergenic    |

|      |           |           |               |
|------|-----------|-----------|---------------|
| chr1 | 182823400 | 182825999 | Lefty2        |
| chr1 | 183849600 | 183853999 | Lbr           |
| chr1 | 188522000 | 188532799 | Tgfb2         |
| chr1 | 191547800 | 191558999 | Ptpn14        |
| chr1 | 192795600 | 192806599 | Vash2         |
| chr1 | 193914200 | 193916399 | Traf5         |
| chr1 | 194656800 | 194664399 | 1700065J18Rik |
| chr1 | 194671400 | 194691799 | Sertad4       |
| chr1 | 194856000 | 194866999 | Syt14         |
| chr2 | 21061000  | 21067199  | Intergenic    |
| chr2 | 25649400  | 25650999  | Gm13539       |
| chr2 | 27530000  | 27536199  | Rxra          |
| chr2 | 28301200  | 28305799  | Ppp1r26       |
| chr2 | 30458600  | 30463799  | Cstad         |
| chr2 | 30784000  | 30785599  | Intergenic    |
| chr2 | 31798600  | 31809599  | Aif1l         |
| chr2 | 32165600  | 32179399  | Mir199b       |
| chr2 | 32866200  | 32867799  | Slc2a8        |
| chr2 | 34088800  | 34114199  | Pbx3          |
| chr2 | 35473200  | 35480799  | Dab2ip        |
| chr2 | 35585800  | 35589999  | Intergenic    |
| chr2 | 50995200  | 51006599  | Rnd3          |
| chr2 | 58415600  | 58423399  | Acvr1         |
| chr2 | 59446600  | 59453999  | Tanc1         |
| chr2 | 60976400  | 60978199  | Intergenic    |
| chr2 | 70495000  | 70496399  | Gorasp2       |
| chr2 | 71463000  | 71470199  | Intergenic    |
| chr2 | 73790400  | 73792399  | Intergenic    |
| chr2 | 75441400  | 75451999  | Intergenic    |
| chr2 | 75864600  | 75874999  | Ttc30a1       |
| chr2 | 75946400  | 75948599  | Ttc30a1       |
| chr2 | 79230000  | 79231399  | Cerkl         |
| chr2 | 79338800  | 79340599  | Intergenic    |
| chr2 | 84488000  | 84491799  | Ctnnd1        |
| chr2 | 90622200  | 90624999  | Agbl2         |
| chr2 | 91033600  | 91038399  | Nr1h3         |
| chr2 | 91289000  | 91304399  | Lrp4          |
| chr2 | 92209400  | 92213199  | Gylt1b        |
| chr2 | 92367400  | 92372599  | Intergenic    |
| chr2 | 92752600  | 92760799  | Syt13         |
| chr2 | 94281000  | 94281799  | Api5          |
| chr2 | 101345800 | 101349199 | Intergenic    |

|      |           |           |               |
|------|-----------|-----------|---------------|
| chr2 | 101634400 | 101641599 | Prr5l         |
| chr2 | 102024200 | 102027999 | Ldlrad3       |
| chr2 | 102274400 | 102310999 | Fjx1          |
| chr2 | 113237800 | 113239999 | Fmn1          |
| chr2 | 116947200 | 116949799 | Spred1        |
| chr2 | 119898000 | 119904399 | Intergenic    |
| chr2 | 130996200 | 131000599 | Spef1         |
| chr2 | 131176000 | 131178399 | Rnf24         |
| chr2 | 132297200 | 132302399 | Intergenic    |
| chr2 | 145498200 | 145504399 | Intergenic    |
| chr2 | 152235200 | 152241799 | Zcchc3        |
| chr2 | 152284000 | 152285399 | Defb23        |
| chr2 | 152548400 | 152552199 | Intergenic    |
| chr2 | 152558600 | 152568399 | Id1           |
| chr2 | 152736600 | 152740599 | Mylk2         |
| chr2 | 154230600 | 154236599 | Snta1         |
| chr2 | 155211800 | 155212999 | Trp53inp2     |
| chr2 | 155339200 | 155340799 | Ggt7          |
| chr2 | 156895400 | 156910399 | 9830001H06Rik |
| chr2 | 164610400 | 164612799 | Snx21         |
| chr2 | 165207800 | 165215199 | Zfp334        |
| chr2 | 166832000 | 166833399 | Ddx27         |
| chr2 | 167172400 | 167177199 | B4galt5       |
| chr2 | 167384000 | 167388799 | Intergenic    |
| chr2 | 169121600 | 169124599 | Intergenic    |
| chr2 | 169457000 | 169462199 | Tshz2         |
| chr2 | 172170400 | 172173999 | 2010011I20Rik |
| chr2 | 172675800 | 172678399 | Intergenic    |
| chr2 | 172686400 | 172689799 | Intergenic    |
| chr2 | 172759000 | 172767999 | Bmp7          |
| chr2 | 181402400 | 181413399 | Sox18         |
| chr3 | 9172200   | 9174799   | Intergenic    |
| chr3 | 9301600   | 9304199   | Intergenic    |
| chr3 | 27605600  | 27614599  | Fndc3b        |
| chr3 | 58439800  | 58443199  | Fam194a       |
| chr3 | 58806800  | 58814199  | Med12l        |
| chr3 | 68669600  | 68676999  | 1110032F04Rik |
| chr3 | 80603200  | 80607999  | Gria2         |
| chr3 | 81876400  | 81879599  | Gucy1b3       |
| chr3 | 83993200  | 83996999  | Gm6525        |
| chr3 | 84055600  | 84065999  | Intergenic    |
| chr3 | 86971000  | 86984599  | Kirrel        |

|      |           |           |               |
|------|-----------|-----------|---------------|
| chr3 | 88304600  | 88309799  | Lmna          |
| chr3 | 90024400  | 90025399  | Rab13         |
| chr3 | 90317000  | 90318599  | S100a1        |
| chr3 | 95908800  | 95909799  | Otud7b        |
| chr3 | 95962400  | 95969199  | Mttr11        |
| chr3 | 100906000 | 100921999 | Ptgrn         |
| chr3 | 100963600 | 100970799 | Intergenic    |
| chr3 | 101179800 | 101207199 | Igsf3         |
| chr3 | 102905000 | 102907799 | Intergenic    |
| chr3 | 103427200 | 103429399 | Syt6          |
| chr3 | 104847000 | 104859599 | Cttnbp2nl     |
| chr3 | 104880000 | 104881599 | 4930564D02Rik |
| chr3 | 107984400 | 107991199 | Amigo1        |
| chr3 | 108086200 | 108090799 | Sort1         |
| chr3 | 114606800 | 114608199 | Olfm3         |
| chr3 | 116414000 | 116416599 | Slc35a3       |
| chr3 | 127407800 | 127410599 | Neurog2       |
| chr3 | 129878400 | 129887999 | Col25a1       |
| chr3 | 130780400 | 130791399 | Intergenic    |
| chr3 | 132605600 | 132615399 | Npnt          |
| chr3 | 142056600 | 142059199 | Pdlim5        |
| chr3 | 142361200 | 142366999 | Ccbl2         |
| chr3 | 145769600 | 145773799 | Wdr63         |
| chr3 | 146066600 | 146068999 | Ssx2ip        |
| chr3 | 148618000 | 148624199 | Lphn2         |
| chr3 | 153385800 | 153388599 | St6galnac3    |
| chr4 | 9593000   | 9597399   | Asph          |
| chr4 | 48550000  | 48557399  | 5730528L13Rik |
| chr4 | 53171400  | 53172599  | Abca1         |
| chr4 | 53453600  | 53456199  | Slc44a1       |
| chr4 | 57793600  | 57797199  | Intergenic    |
| chr4 | 62333400  | 62337399  | Rgs3          |
| chr4 | 86873000  | 86877799  | Slc24a2       |
| chr4 | 94715800  | 94718399  | Jun           |
| chr4 | 97986400  | 97988799  | Intergenic    |
| chr4 | 98784400  | 98790999  | Dock7         |
| chr4 | 107835600 | 107842599 | Echdc2        |
| chr4 | 108073600 | 108081599 | Gpx7          |
| chr4 | 116268600 | 116271399 | C530005A16Rik |
| chr4 | 116766400 | 116771399 | Ptch2         |
| chr4 | 118905600 | 118907999 | Lepre1        |
| chr4 | 119406400 | 119408999 | Intergenic    |

|      |           |           |               |
|------|-----------|-----------|---------------|
| chr4 | 119819000 | 119824799 | Intergenic    |
| chr4 | 119912200 | 119915999 | Intergenic    |
| chr4 | 119921600 | 119964399 | Foxo6         |
| chr4 | 122909000 | 122918799 | Heyl          |
| chr4 | 129053800 | 129055999 | Zbtb8a        |
| chr4 | 132309800 | 132317599 | Smpdl3b       |
| chr4 | 132564000 | 132567399 | Ahdc1         |
| chr4 | 133958000 | 133959399 | Pafah2        |
| chr4 | 134318800 | 134328399 | Ldlrap1       |
| chr4 | 135686400 | 135692599 | Intergenic    |
| chr4 | 138468600 | 138469599 | Otud3         |
| chr4 | 141150400 | 141158999 | Fblim1        |
| chr4 | 141792600 | 141796599 | Kazn          |
| chr4 | 142886000 | 142893399 | Pdpn          |
| chr4 | 147309000 | 147313199 | Plod1         |
| chr4 | 147511200 | 147514199 | Mad2l2        |
| chr4 | 155408200 | 155410599 | Tnfrsf18      |
| chr4 | 155559800 | 155561999 | Agrn          |
| chr5 | 5514000   | 5515199   | Cldn12        |
| chr5 | 13396800  | 13400799  | Sema3a        |
| chr5 | 20208600  | 20210399  | Phtf2         |
| chr5 | 20559400  | 20561199  | Ptpn12        |
| chr5 | 23179200  | 23181199  | Intergenic    |
| chr5 | 31246400  | 31249399  | Cgref1        |
| chr5 | 36098800  | 36102999  | Ablim2        |
| chr5 | 42096200  | 42099399  | Rab28         |
| chr5 | 44485800  | 44494599  | Prom1         |
| chr5 | 52906600  | 52908799  | Intergenic    |
| chr5 | 66913000  | 66916999  | Apbb2         |
| chr5 | 76756400  | 76757399  | Pdcl2         |
| chr5 | 77444000  | 77446599  | 1700023E05Rik |
| chr5 | 77959400  | 77962399  | Intergenic    |
| chr5 | 93432400  | 93437799  | Intergenic    |
| chr5 | 103769400 | 103770799 | Intergenic    |
| chr5 | 114624000 | 114626599 | Acacb         |
| chr5 | 114962800 | 114965199 | Intergenic    |
| chr5 | 114985200 | 114990199 | Intergenic    |
| chr5 | 116738600 | 116740199 | Ccdc60        |
| chr5 | 117570400 | 117572199 | Taok3         |
| chr5 | 122295400 | 122296399 | Fam109a       |
| chr5 | 124134400 | 124136199 | Clip1         |
| chr5 | 128111200 | 128117399 | Glt1d1        |



|      |           |           |               |
|------|-----------|-----------|---------------|
| chr5 | 135723200 | 135729399 | Fzd9          |
| chr5 | 137055800 | 137058599 | Intergenic    |
| chr5 | 137370600 | 137372799 | Intergenic    |
| chr5 | 137787200 | 137796199 | Ephb4         |
| chr5 | 151988600 | 151995999 | Stard13       |
| chr5 | 152032600 | 152039399 | Intergenic    |
| chr6 | 8725600   | 8730799   | Ica1          |
| chr6 | 17312200  | 17314799  | Intergenic    |
| chr6 | 30409800  | 30415799  | Intergenic    |
| chr6 | 34403600  | 34407399  | Intergenic    |
| chr6 | 38826400  | 38829599  | Hipk2         |
| chr6 | 39504400  | 39512799  | Dennd2a       |
| chr6 | 42641200  | 42645199  | Fam115a       |
| chr6 | 45009400  | 45011399  | Cntnap2       |
| chr6 | 48394600  | 48399999  | Sspo          |
| chr6 | 51559800  | 51565599  | Intergenic    |
| chr6 | 54273200  | 54286799  | Prr15         |
| chr6 | 70960600  | 70968999  | Intergenic    |
| chr6 | 70997600  | 71000799  | Intergenic    |
| chr6 | 87927600  | 87933199  | H1fx          |
| chr6 | 89307800  | 89314199  | Plxna1        |
| chr6 | 100237800 | 100239999 | Rybp          |
| chr6 | 100670000 | 100672999 | Gxylt2        |
| chr6 | 112220800 | 112227599 | Lmcd1         |
| chr6 | 114992000 | 114993999 | Tamm41        |
| chr6 | 115162000 | 115164199 | Timp4         |
| chr6 | 116143600 | 116145199 | Tmcc1         |
| chr6 | 119398400 | 119404999 | Fbxl14        |
| chr6 | 119491000 | 119496199 | Wnt5b         |
| chr6 | 119796800 | 119801399 | 3110021A11Rik |
| chr6 | 122246400 | 122249999 | Intergenic    |
| chr6 | 122288200 | 122289399 | Phc1          |
| chr6 | 124704600 | 124711599 | Atn1          |
| chr6 | 124804200 | 124810399 | Leprel2       |
| chr6 | 124857800 | 124863199 | Lag3          |
| chr6 | 124940000 | 124955599 | Pianp         |
| chr6 | 125262600 | 125264599 | Ltbr          |
| chr6 | 125328200 | 125332999 | Plekhg6       |
| chr6 | 125441600 | 125446999 | Cd9           |
| chr6 | 125551000 | 125556799 | Vwf           |
| chr6 | 128304000 | 128306399 | Tulp3         |
| chr6 | 135014600 | 135017599 | Gprc5a        |

|      |           |           |               |
|------|-----------|-----------|---------------|
| chr6 | 140370000 | 140374599 | Plekha5       |
| chr6 | 145690800 | 145699799 | Intergenic    |
| chr7 | 4114600   | 4118399   | Cdc42ep5      |
| chr7 | 17202600  | 17204799  | Grf1          |
| chr7 | 19945200  | 19950799  | Ppp1r13l      |
| chr7 | 25854800  | 25859999  | Grik5         |
| chr7 | 51690200  | 51704599  | Lrrc4b        |
| chr7 | 52228600  | 52230999  | Cpt1c         |
| chr7 | 53037400  | 53056999  | Lmtk3         |
| chr7 | 63096000  | 63099999  | Cyfp1         |
| chr7 | 75089200  | 75104399  | Igf1r         |
| chr7 | 78616400  | 78618399  | Intergenic    |
| chr7 | 86931400  | 86939199  | Intergenic    |
| chr7 | 86986200  | 86995199  | Anpep         |
| chr7 | 87078600  | 87083999  | 2610034B18Rik |
| chr7 | 87169200  | 87171399  | Zfp710        |
| chr7 | 89076200  | 89083199  | Hdgfrp3       |
| chr7 | 89318400  | 89321799  | Sh3gl3        |
| chr7 | 97574400  | 97576599  | Ccdc89        |
| chr7 | 105258600 | 105261599 | Myo7a         |
| chr7 | 105504800 | 105512199 | Tsku          |
| chr7 | 107756600 | 107758799 | Mrpl48        |
| chr7 | 108041800 | 108044599 | Mir3102       |
| chr7 | 108981000 | 108989799 | Inpp1         |
| chr7 | 116813200 | 116818999 | Intergenic    |
| chr7 | 123448800 | 123453399 | Intergenic    |
| chr7 | 125735600 | 125741799 | Tmc5          |
| chr7 | 134779400 | 134781599 | Intergenic    |
| chr7 | 135559400 | 135563599 | Rgs10         |
| chr7 | 135665400 | 135668599 | Bag3          |
| chr7 | 135755200 | 135756799 | Inpp5f        |
| chr7 | 141860200 | 141865199 | Dock1         |
| chr7 | 149556000 | 149559999 | Ifitm10       |
| chr7 | 150235200 | 150243799 | R74862        |
| chr8 | 13952200  | 13967799  | 2610019F03Rik |
| chr8 | 28368800  | 28372799  | Eif4ebp1      |
| chr8 | 32222400  | 32224199  | Rnf122        |
| chr8 | 32296600  | 32298999  | Fut10         |
| chr8 | 35035200  | 35044199  | Rbpms         |
| chr8 | 35792800  | 35797599  | Intergenic    |
| chr8 | 35866600  | 35874399  | Dusp4         |
| chr8 | 47235600  | 47237199  | Intergenic    |

|       |           |           |               |
|-------|-----------|-----------|---------------|
| chr8  | 49073200  | 49078599  | Wwc2          |
| chr8  | 86715800  | 86717599  | Intergenic    |
| chr8  | 97412200  | 97414399  | Intergenic    |
| chr8  | 107676200 | 107680199 | Intergenic    |
| chr8  | 107872200 | 107875199 | Slc9a5        |
| chr8  | 109453600 | 109463999 | Sntb2         |
| chr8  | 118964600 | 118967199 | Intergenic    |
| chr8  | 119257400 | 119260199 | Cdyl2         |
| chr8  | 119385800 | 119389999 | Intergenic    |
| chr8  | 122784800 | 122790999 | Intergenic    |
| chr8  | 123824400 | 123845199 | Intergenic    |
| chr8  | 129040400 | 129042599 | Intergenic    |
| chr9  | 14660400  | 14668999  | Gpr83         |
| chr9  | 36603400  | 36605599  | Ei24          |
| chr9  | 37332800  | 37341799  | Esam          |
| chr9  | 44846200  | 44853599  | Mpzi2         |
| chr9  | 44938800  | 44954399  | Scn4b         |
| chr9  | 46037800  | 46040399  | Apoa1         |
| chr9  | 51083800  | 51089999  | Gm684         |
| chr9  | 54764600  | 54766599  | Agphd1        |
| chr9  | 56708400  | 56715399  | Cspg4         |
| chr9  | 57311000  | 57318199  | Scamp5        |
| chr9  | 60590200  | 60592599  | Intergenic    |
| chr9  | 61967400  | 61969799  | Intergenic    |
| chr9  | 62383400  | 62385599  | Coro2b        |
| chr9  | 62956400  | 62959199  | Intergenic    |
| chr9  | 63772600  | 63777199  | Intergenic    |
| chr9  | 69958000  | 69960799  | Fam81a        |
| chr9  | 70051400  | 70060199  | Myo1e         |
| chr9  | 71568200  | 71575199  | Cgnl1         |
| chr9  | 71615800  | 71622199  | Cgnl1         |
| chr9  | 72760600  | 72764799  | Pygo1         |
| chr9  | 75162400  | 75163399  | Gnb5          |
| chr9  | 84667600  | 84669199  | 4930554C24Rik |
| chr9  | 92434400  | 92438799  | Plod2         |
| chr9  | 95714000  | 95715999  | Pls1          |
| chr9  | 101151200 | 101154599 | Ppp2r3a       |
| chr9  | 107606800 | 107616399 | Sema3f        |
| chr9  | 118836000 | 118837199 | Ctdspl        |
| chr10 | 6601400   | 6608399   | Plekkg1       |
| chr10 | 7078600   | 7079799   | H60c          |
| chr10 | 8602400   | 8608599   | Sash1         |

|       |           |           |               |
|-------|-----------|-----------|---------------|
| chr10 | 11001400  | 11003399  | Fbxo30        |
| chr10 | 13041800  | 13046199  | Phactr2       |
| chr10 | 18036200  | 18042199  | Intergenic    |
| chr10 | 18461600  | 18465399  | D10Bwg1379e   |
| chr10 | 21711000  | 21714199  | Sgk1          |
| chr10 | 43196800  | 43198999  | Bend3         |
| chr10 | 56093800  | 56101399  | Gja1          |
| chr10 | 59677200  | 59684199  | Chst3         |
| chr10 | 66464800  | 66467599  | Intergenic    |
| chr10 | 66586200  | 66591999  | Jmjd1c        |
| chr10 | 75241000  | 75246799  | Gstt3         |
| chr10 | 75259600  | 75262599  | Gstt1         |
| chr10 | 76046200  | 76047999  | Ftcd          |
| chr10 | 79048000  | 79048799  | Theg          |
| chr10 | 79239600  | 79243199  | Fstl3         |
| chr10 | 80691000  | 80696599  | Atcay         |
| chr10 | 80986000  | 80988399  | Gna15         |
| chr10 | 84846800  | 84853599  | Btbd11        |
| chr10 | 90427200  | 90437399  | Apaf1         |
| chr10 | 93975800  | 93982399  | Tmcc3         |
| chr10 | 94726600  | 94729799  | Cradd         |
| chr10 | 94857200  | 94863399  | Intergenic    |
| chr10 | 94873000  | 94886399  | Socs2         |
| chr10 | 98378000  | 98380399  | Atp2b1        |
| chr10 | 110772600 | 110773999 | Intergenic    |
| chr10 | 110942200 | 110948799 | Phlda1        |
| chr10 | 116187000 | 116188399 | Intergenic    |
| chr10 | 120911400 | 120913399 | Rassf3        |
| chr10 | 126773200 | 126780199 | Gli1          |
| chr10 | 127101200 | 127105199 | Nab2          |
| chr10 | 127175600 | 127177799 | Zbtb39        |
| chr10 | 128024800 | 128028999 | Erbp3         |
| chr11 | 4955000   | 4968599   | Gas2l1        |
| chr11 | 20728200  | 20738999  | 1110067D22Rik |
| chr11 | 22185400  | 22191599  | Ehbp1         |
| chr11 | 22510000  | 22511799  | Intergenic    |
| chr11 | 29271000  | 29276199  | Ccdc88a       |
| chr11 | 32200400  | 32201799  | Hbq1a         |
| chr11 | 48670600  | 48673599  | Intergenic    |
| chr11 | 51062200  | 51064999  | Intergenic    |
| chr11 | 52570800  | 52591599  | Fstl4         |
| chr11 | 53331600  | 53335799  | Sept8         |

|       |           |           |            |
|-------|-----------|-----------|------------|
| chr11 | 53791200  | 53795599  | Slc22a21   |
| chr11 | 54714800  | 54718199  | Gpx3       |
| chr11 | 58418800  | 58420399  | Intergenic |
| chr11 | 59988600  | 59991199  | Rai1       |
| chr11 | 64787400  | 64788599  | Elac2      |
| chr11 | 68451000  | 68453999  | Intergenic |
| chr11 | 68501600  | 68511199  | Myh10      |
| chr11 | 69009600  | 69012799  | Alox8      |
| chr11 | 69233000  | 69236799  | Kdm6b      |
| chr11 | 69413000  | 69431799  | Atp1b2     |
| chr11 | 69434800  | 69438799  | Sat2       |
| chr11 | 69507600  | 69509999  | Tnfsf12    |
| chr11 | 70353000  | 70358399  | Pld2       |
| chr11 | 71547400  | 71568999  | Wscd1      |
| chr11 | 72389400  | 72392399  | Intergenic |
| chr11 | 77999800  | 78008799  | Rab34      |
| chr11 | 79786000  | 79788599  | Intergenic |
| chr11 | 94879400  | 94883799  | Samd14     |
| chr11 | 96958000  | 96964999  | Tbx21      |
| chr11 | 96974000  | 96980599  | Tbx21      |
| chr11 | 97169000  | 97174199  | Mrpl45     |
| chr11 | 97297800  | 97304799  | Intergenic |
| chr11 | 97553800  | 97564199  | Pcgf2      |
| chr11 | 98206400  | 98215399  | Ppp1r1b    |
| chr11 | 98418600  | 98426599  | Intergenic |
| chr11 | 98459200  | 98464399  | Gm12       |
| chr11 | 99103800  | 99106999  | Krt222     |
| chr11 | 100623000 | 100624599 | Hcrt       |
| chr11 | 101237400 | 101238999 | G6pc       |
| chr11 | 102087800 | 102093799 | Hdac5      |
| chr11 | 102290000 | 102292599 | Grn        |
| chr11 | 102296000 | 102301399 | Grn        |
| chr11 | 102973000 | 102974399 | Hexim1     |
| chr11 | 103220600 | 103226399 | Arhgap27   |
| chr11 | 103893400 | 103894999 | Intergenic |
| chr11 | 107647000 | 107679399 | Cacng4     |
| chr11 | 108780000 | 108790799 | Axin2      |
| chr11 | 110398600 | 110399999 | Intergenic |
| chr11 | 114324400 | 114331799 | Intergenic |
| chr11 | 114500200 | 114501599 | Intergenic |
| chr11 | 114586600 | 114590599 | Dnaic2     |
| chr11 | 115231800 | 115248799 | Cdr2l      |

|       |           |           |               |
|-------|-----------|-----------|---------------|
| chr11 | 115716200 | 115724799 | Intergenic    |
| chr11 | 116440200 | 116442399 | Ube2o         |
| chr11 | 116687800 | 116689999 | Mxra7         |
| chr11 | 116920000 | 116922399 | Intergenic    |
| chr11 | 119905800 | 119912999 | Aatk          |
| chr11 | 121247200 | 121251199 | Rab40b        |
| chr12 | 4844800   | 4850599   | Fkbp1b        |
| chr12 | 21115600  | 21120199  | Asap2         |
| chr12 | 76407000  | 76413999  | Rhoj          |
| chr12 | 77631800  | 77636799  | Mir5135       |
| chr12 | 85532800  | 85534199  | C130039O16Rik |
| chr12 | 86034400  | 86044599  | Tmem90a       |
| chr12 | 87419000  | 87427799  | lft43         |
| chr12 | 101480200 | 101481799 | Intergenic    |
| chr12 | 104153000 | 104155399 | Intergenic    |
| chr12 | 107606400 | 107625599 | Intergenic    |
| chr12 | 107764000 | 107769599 | Intergenic    |
| chr12 | 108264600 | 108266799 | Intergenic    |
| chr12 | 109044800 | 109046999 | Intergenic    |
| chr12 | 109522200 | 109524599 | Ccdc85c       |
| chr12 | 114038200 | 114049799 | BC022687      |
| chr12 | 114112000 | 114118399 | Intergenic    |
| chr13 | 9794200   | 9796599   | Intergenic    |
| chr13 | 12632000  | 12637599  | Intergenic    |
| chr13 | 31075200  | 31081599  | Intergenic    |
| chr13 | 47021800  | 47026799  | Kif13a        |
| chr13 | 47367600  | 47369199  | Intergenic    |
| chr13 | 51342200  | 51343599  | Intergenic    |
| chr13 | 64444600  | 64445999  | Intergenic    |
| chr13 | 65276800  | 65278199  | Olfra466      |
| chr13 | 73594800  | 73596999  | Lpcat1        |
| chr13 | 75842200  | 75848399  | Eli2          |
| chr13 | 76076600  | 76084399  | Rhobtb3       |
| chr13 | 89678200  | 89682199  | Hapln1        |
| chr13 | 94074200  | 94078199  | Homer1        |
| chr13 | 95052600  | 95057999  | Scamp1        |
| chr13 | 111587400 | 111590199 | Intergenic    |
| chr13 | 112889600 | 112893399 | Intergenic    |
| chr14 | 8831400   | 8837199   | Abhd6         |
| chr14 | 9047000   | 9050199   | Kctd6         |
| chr14 | 18491600  | 18497599  | Thrb          |
| chr14 | 19873800  | 19875599  | Intergenic    |

|       |           |           |            |
|-------|-----------|-----------|------------|
| chr14 | 32745000  | 32748399  | Intergenic |
| chr14 | 34259000  | 34259999  | Mapk8      |
| chr14 | 46183400  | 46186199  | Intergenic |
| chr14 | 52533800  | 52535599  | Ndrp2      |
| chr14 | 52738600  | 52740999  | Rpgrip1    |
| chr14 | 54878400  | 54880999  | Abhd4      |
| chr14 | 55047200  | 55053799  | Mmp14      |
| chr14 | 55188200  | 55198199  | Jub        |
| chr14 | 55672600  | 55675599  | Intergenic |
| chr14 | 56956000  | 56958399  | Intergenic |
| chr14 | 60505000  | 60506399  | Atp8a2     |
| chr14 | 65839800  | 65841199  | Fzd3       |
| chr14 | 70589400  | 70596399  | Sorbs3     |
| chr14 | 71003600  | 71005599  | Fam160b2   |
| chr14 | 75038800  | 75044999  | Htr2a      |
| chr14 | 100875600 | 100877999 | Intergenic |
| chr14 | 102004800 | 102008599 | Tbc1d4     |
| chr14 | 103378000 | 103385199 | Mir5130    |
| chr14 | 106290600 | 106300999 | Spry2      |
| chr14 | 119507000 | 119508399 | Uggt2      |
| chr15 | 6334200   | 6340999   | Dab2       |
| chr15 | 25551400  | 25554399  | Myo10      |
| chr15 | 36310200  | 36312199  | Intergenic |
| chr15 | 54109600  | 54110599  | Tnfrsf11b  |
| chr15 | 57520200  | 57528399  | Zhx2       |
| chr15 | 58043800  | 58046399  | Fbxo32     |
| chr15 | 58653200  | 58654799  | Tmem65     |
| chr15 | 78257000  | 78260199  | Kctd17     |
| chr15 | 78536800  | 78551399  | Elfn2      |
| chr15 | 79088400  | 79094199  | Slc16a8    |
| chr15 | 81060600  | 81071999  | Mchr1      |
| chr15 | 84048400  | 84049799  | Intergenic |
| chr15 | 89207200  | 89210999  | Odf3b      |
| chr15 | 89326400  | 89334999  | Shank3     |
| chr15 | 91502400  | 91504799  | Lrrk2      |
| chr15 | 93347800  | 93351999  | Prickle1   |
| chr15 | 96083800  | 96085999  | Intergenic |
| chr15 | 98955400  | 98958999  | Spats2     |
| chr15 | 99122000  | 99124999  | Prpf40b    |
| chr15 | 99632400  | 99635799  | Lima1      |
| chr15 | 100434000 | 100436199 | Intergenic |
| chr15 | 102501600 | 102505999 | Mir688     |

|       |          |          |               |
|-------|----------|----------|---------------|
| chr16 | 13443000 | 13453799 | Mir193b       |
| chr16 | 20693000 | 20700599 | Fam131a       |
| chr16 | 21974000 | 21978199 | Liph          |
| chr16 | 31080000 | 31081199 | Al480653      |
| chr16 | 32641600 | 32642399 | Tnk2          |
| chr16 | 34093600 | 34097799 | Umps          |
| chr16 | 35570600 | 35572999 | Sema5b        |
| chr16 | 37583200 | 37586399 | Hgd           |
| chr16 | 38481600 | 38486199 | Cd80          |
| chr16 | 43501600 | 43506999 | LOC626693     |
| chr16 | 45093600 | 45094799 | Ccdc80        |
| chr16 | 45408400 | 45409199 | Cd200         |
| chr16 | 52448400 | 52455399 | Alcam         |
| chr16 | 62853400 | 62855999 | Pros1         |
| chr16 | 78930400 | 78932799 | Chodl         |
| chr16 | 92335200 | 92337999 | Intergenic    |
| chr16 | 95419600 | 95421599 | Intergenic    |
| chr17 | 10527200 | 10530399 | Intergenic    |
| chr17 | 13063800 | 13066599 | Mrgprh        |
| chr17 | 23721000 | 23724599 | Zfp13         |
| chr17 | 28825800 | 28827999 | Mapk14        |
| chr17 | 33941600 | 33951999 | Kank3         |
| chr17 | 34395400 | 34407199 | H2-Ab1        |
| chr17 | 34526800 | 34530399 | BC051142      |
| chr17 | 35956400 | 35959999 | Ier3          |
| chr17 | 36001600 | 36005199 | Ppp1r18       |
| chr17 | 37078000 | 37086399 | Rnf39         |
| chr17 | 46764600 | 46766999 | Ptk7          |
| chr17 | 48057000 | 48060999 | Foxp4         |
| chr17 | 48191200 | 48196199 | Intergenic    |
| chr17 | 56258800 | 56264999 | Lrg1          |
| chr17 | 56807600 | 56809799 | Ranbp3        |
| chr17 | 66869200 | 66870399 | Rab12         |
| chr17 | 83521200 | 83524999 | Intergenic    |
| chr17 | 87360400 | 87366999 | Rhoq          |
| chr17 | 87507000 | 87510399 | Socs5         |
| chr17 | 87871200 | 87874999 | Intergenic    |
| chr18 | 4634200  | 4637599  | 9430020K01Rik |
| chr18 | 34999200 | 35001599 | Reep2         |
| chr18 | 35021000 | 35026599 | Egr1          |
| chr18 | 35277000 | 35281399 | Ctnna1        |
| chr18 | 36031600 | 36035399 | Intergenic    |



|       |           |           |               |
|-------|-----------|-----------|---------------|
| chr18 | 36689800  | 36692599  | Slc4a9        |
| chr18 | 37962400  | 37971599  | Pcdhgc3       |
| chr18 | 37972400  | 37977399  | Pcdhgc4       |
| chr18 | 53576000  | 53578599  | Ppic          |
| chr18 | 61069800  | 61073399  | Arsi          |
| chr18 | 61191800  | 61199399  | Cdx1          |
| chr18 | 61404800  | 61406199  | Pde6a         |
| chr18 | 61560200  | 61564199  | Ppargc1b      |
| chr18 | 61797600  | 61801599  | LOC545261     |
| chr18 | 62064400  | 62074799  | Ablim3        |
| chr18 | 65952600  | 65954599  | Sec11c        |
| chr18 | 66615600  | 66622799  | Pmaip1        |
| chr18 | 67545800  | 67557999  | Tubb6         |
| chr18 | 69356000  | 69362199  | Intergenic    |
| chr18 | 73780800  | 73788199  | Intergenic    |
| chr18 | 77953000  | 77960999  | Intergenic    |
| chr18 | 82753000  | 82754599  | Mbp           |
| chr19 | 5473600   | 5476399   | Efemp2        |
| chr19 | 10941200  | 10944799  | Tmem132a      |
| chr19 | 23206200  | 23219799  | Klf9          |
| chr19 | 24245400  | 24251799  | Tjp2          |
| chr19 | 32459600  | 32467399  | 2700046G09Rik |
| chr19 | 36203400  | 36205199  | Ankrd1        |
| chr19 | 38114800  | 38122399  | Myof          |
| chr19 | 41729400  | 41754599  | Slit1         |
| chr19 | 42056200  | 42058599  | Ubtcd1        |
| chr19 | 42219400  | 42224999  | Marveld1      |
| chr19 | 44473800  | 44485399  | Scd1          |
| chr19 | 45090200  | 45093999  | Lzts2         |
| chr19 | 46597600  | 46599399  | Intergenic    |
| chr19 | 47416600  | 47420399  | Neurl1a       |
| chr19 | 47927600  | 47930999  | Gsto1         |
| chrX  | 7782200   | 7785599   | Porcn         |
| chrX  | 20446800  | 20448399  | Timp1         |
| chrX  | 35533000  | 35534799  | Zbtb33        |
| chrX  | 70917600  | 70920999  | Slc6a8        |
| chrX  | 91785400  | 91788399  | Maged1        |
| chrX  | 92220000  | 92222399  | Spin4         |
| chrX  | 96081200  | 96087399  | Ophn1         |
| chrX  | 162674200 | 162679199 | Gpm6b         |

**Supplementary Table 2 - Genes with 4OHT-dependent increase of H3K27me3 in ILC87-Ik1-ER cells.**

| Gene     | Ikaros binding | Suz12 increase | Decreased H3K27me3 in primary thymocytes |
|----------|----------------|----------------|------------------------------------------|
| Ahcyl2   | +              | +              | -                                        |
| Aif1l    | +              | -              | + <sup>a</sup>                           |
| Alcam    | +              | -              | + <sup>a</sup>                           |
| Apbb2    | +              | +              | + <sup>a</sup>                           |
| Arhgap26 | +              | -              | + <sup>b</sup>                           |
| Arhgef10 | +/-            | +              | -                                        |
| B3gnt6   | +              | +              | -                                        |
| C77080   | +              | +              | + <sup>b</sup>                           |
| Cacnb3   | +              | +              | -                                        |
| Chd7     | +              | +              | + <sup>a</sup>                           |
| Coro2a   | +              | +/-            | -                                        |
| Ctdsp2   | +              | -              | -                                        |
| Ctnd1    | +/-            | -              | + <sup>a</sup>                           |
| Cuedc1   | +              | +              | -                                        |
| Cytip1   | +              | -              | + <sup>a</sup>                           |
| Dock1    | +              | +              | + <sup>a</sup>                           |
| Dusp6    | +              | +/-            | -                                        |
| Fam163b  | +              | -              | + <sup>b</sup>                           |
| Fndc3b   | +              | +              | + <sup>a</sup>                           |
| Fnip2    | +              | -              | -                                        |
| Fosl2    | +              | +/-            | -                                        |
| Gfra2    | +              | +              | -                                        |
| Gli1     | +              | +              | + <sup>a</sup>                           |
| Gls2     | +              | +              | + <sup>b</sup>                           |
| Gpr83    | +              | -              | + <sup>a</sup>                           |
| H1f0     | +              | +              | + <sup>a</sup>                           |
| Hopx     | +              | +/-            | -                                        |
| Ier3     | +/-            | +              | + <sup>a</sup>                           |
| Igf1r    | +              | +              | + <sup>a</sup>                           |
| Il17rd   | +              | +/-            | -                                        |
| Itga11   | +              | +/-            | -                                        |
| Jun      | +              | +              | + <sup>a</sup>                           |
| Kctd1    | +              | +              | -                                        |
| Kctd12   | +              | +              | + <sup>a</sup>                           |
| Lhx2     | +/-            | -              | -                                        |
| Lipg     | +/-            | -              | + <sup>b</sup>                           |
| Lpcat1   | +              | +              | + <sup>a</sup>                           |
| Lzts2    | +              | +/-            | + <sup>a</sup>                           |
| Mgat4b   | +              | +              | + <sup>b</sup>                           |
| Nab2     | +              | +/-            | + <sup>a</sup>                           |
| Nfia     | +              | -              | + <sup>b</sup>                           |
| Nkd1     | +              | +              | -                                        |
| Parva    | +              | +              | -                                        |
| Pcgf2    | +              | +              | + <sup>b</sup>                           |
| Ppp1r9b  | +              | +              | -                                        |
| Pvrl1    | +              | +              | + <sup>b</sup>                           |
| Rbpms    | +              | +              | + <sup>a</sup>                           |
| Rnf182   | +              | -              | + <sup>b</sup>                           |
| Scamp5   | +              | +/-            | + <sup>a</sup>                           |
| Scn4b    | +              | +              | + <sup>a</sup>                           |
| Sertad4  | +              | +              | + <sup>a</sup>                           |
| Shb      | +              | +              | + <sup>b</sup>                           |
| Slc45a3  | +              | +              | + <sup>a</sup>                           |
| Smpd13b  | +              | -              | + <sup>a</sup>                           |
| Tbkbp1   | +              | +              | + <sup>b</sup>                           |
| Tnfrsf11 | +              | +              | + <sup>b</sup>                           |
| Trio     | +              | +              | -                                        |
| Ubt1     | +/-            | -              | + <sup>a</sup>                           |
| Vash1    | +              | -              | + <sup>b</sup>                           |
| Wasf1    | +              | +              | -                                        |
| Xylt1    | +              | +              | + <sup>b</sup>                           |

Genes with increased H3K27me3 and Ikaros binding in 4OHT-treated ILC87-Ik1-ER cells (see Fig. 5a and Supplementary Fig. 8b for specific examples). Genes in italics were identified through visual assessment of the data. The rest were selected bioinformatically as having an Ikaros peak in 4OHT-treated cells which overlapped with a H3K27me3 island that increased >1.8x between EtOH- and 4OHT-treated cells. The second column documents Ikaros binding that coincides with H3K27me3: (+) strong binding; (+/-) small peak but clearly above background. The third column documents increased Suz12 binding after 3d of 4OHT treatment: (+) clear increase; (+/-) small peak close to background level; (-) absent or unchanged Suz12 peak. The last column indicates whether H3K27me3 is decreased at the corresponding regions in primary Ik<sup>L/L</sup> thymocytes: <sup>a</sup> identified among the 583 regions in Fig. 2b; <sup>b</sup> visual inspection of the data confirmed clear decrease of H3K27me3 at the corresponding region though it did not pass the bioinformatic selection threshold.



|                                             |                        |                                                                                                                                                                                                                                                                                                                                                                                                                                                                                       |
|---------------------------------------------|------------------------|---------------------------------------------------------------------------------------------------------------------------------------------------------------------------------------------------------------------------------------------------------------------------------------------------------------------------------------------------------------------------------------------------------------------------------------------------------------------------------------|
| and Function                                |                        | MAPK14,CD9,PLEKHG5,IRS1,SPRY2,ALCAM,RXRA,CHD7,FOXP4                                                                                                                                                                                                                                                                                                                                                                                                                                   |
| Organismal Development                      | 2.38 x10 <sup>-4</sup> | NAB2,ST6GAL1,MYH10,INHA,SLC6A9,RDH10,ESRRB,ARL13B,RORA,MCOLN3,CUX2,ZBTB20,ARHGEF11,GPC1,HIPK2,GRSF1,PDE2A,AXIN2,GJA1,ACP2,BCOR,GRIA2,LMNA,RHOJ,MYOF,GPX7,INHBA,DDR1,SHROOM4,OPHN1,DOCK1,TSHZ1,CD9,PPP2R3A,RAI1,IRS1,ALCAM,ARHGAP35,PLTP,RXRA,FOXP4,SCD,RAB28,MMP14,CTNNA1,BMPR2,PTPN1,EIF4EBP1,KLF9,CSPG4,PDLIM5,IGF1,PPARGC1B, SORT1, CUL9,SEMA3F,LUZP1,AKAP5,SH3GL3,DAB2IP,GNAQ,ACVR1,MYOZ1,ERBB3,ID3,GRN,APLP2,MAPK14,PLEKHG5,NFIA,SPRY2,ATP1B2,PEA15,APBB2,DSCAM,JAK3,CHD7,CTNND1 |
| Cell-To-Cell Signaling and Interaction      | 2.69 x10 <sup>-4</sup> | ST6GAL1,INHA,ESRRB,,GNB4,RORA,EXOC2,ARHGEF11,TRAF5,HIPK2,WNT5B,GOLPH3,RND2,GJA1,PPP1R1B,GRIA2,P2RX5,LAG3,MYOF,INHBA,OPHN1,DOCK1,RPS6KA6,IRS1,ALCAM,GPR125,RAP2A,MOK,MMP14,CTNNA1,WNT8B,ZBTB33,EIF4EBP1,GSTT1,CSPG4,IGF1R, SORT1,LDLRAP1,PEX11A,AKAP5,KLC2,PTPRK,SH3GL3,RTKN,GNAQ,ACVR1,ERBB3,ID3,MAPK14,PBX3,SPRY2,PEA15,LRP1                                                                                                                                                         |
| Cellular Movement                           | 5.26 x10 <sup>-4</sup> | FHOD1,ST6GAL1,MYH10,PLD2, FNDC3B,AMD1,TSC22D3,RORA,GFAP,ARHGEF11,B4GALT5,GPC1,HIPK2,WNT5B,GJA1,PDE2A,GRIA2,LAG3,LMNA,FLOT1,INHBA,DDR1,DOCK1,RPS6KA6,CD9,CYFIP1,IRS1,ALCAM,ARHGAP35,PLTP,RXRA,RAP2A,RAB28,MMP14,PTPN14,CTNNA1,BMPR2,PTPN12,CCDC88A,SH3PXD2B,CSPG4,IGF1R,SORS3, SORT1,LDLRAP1,SEMA3F,PTPRK,ACVR1,ERBB3,ID3,GRN,MAPK14,PLEKHG5,NFIA,SPRY2,APBB2,JAK3,LRP1,CTNND1                                                                                                         |
| Cellular Compromise                         | 5.99 x10 <sup>-4</sup> | MYH10,OSBPL1A,GJA1,SGK1,RTKN,GRIA2,LMNA,ESRRB,GPX7,MAPK14,RHOQ,CSPG4,SGIP1,IGF1R,HIPK2                                                                                                                                                                                                                                                                                                                                                                                                |
| Respiratory System Development and Function | 8.4 x10 <sup>-4</sup>  | NAB2,GJA1,SLC6A9,RDH10,MMP14,GNAQ,BMPR2,TSHZ1,MAPK14,CD9,PBX3,RAI1,SPRY2,PPARGC1B,DSCAM,RXRA                                                                                                                                                                                                                                                                                                                                                                                          |

Ingenuity Pathway Analysis of the biological functions associated with genes that had decreased H3K27me3 in Ik<sup>L/L</sup> DN or DP cells (392 genes represented on the Affymetrix 430 2.0 array). The biological functions with the most significant enrichment are shown, as well as the associated genes.
